# Supplementary material for: Phosphine-catalyzed domino reaction: an efficient method for the synthesis of highly functionalized spirooxazolines
Source: Royal Society of Chemistry journal article supplement (doi:10.1039/c2ob26338f), 2012-01-01
Supplement: c2ob26338f.pdf [file c2ob26338f.pdf]

# Supplementary Material

## Phosphine-Catalyzed Domino Reaction: An Efficient Method for the Synthesis of Highly Functionalized Spirooxazolines

Lihua Yang, Peizhong Xie, Erqing Li, Xin Li, You Huang\* and Ruyun Chen

State Key Laboratory and Institute of Elemento-organic Chemistry, Nankai University,  
Tianjin 300071, China

Fax: (+86)22-23503627; E-mail: [hyou@nankai.edu.cn](mailto:hyou@nankai.edu.cn)

|                                           |     |
|-------------------------------------------|-----|
| 1. NMR spectra for all new compounds..... | S1  |
| 2. Chiral HPLC analyses (3a).....         | S20 |

## 1. NMR spectra for all new compounds.

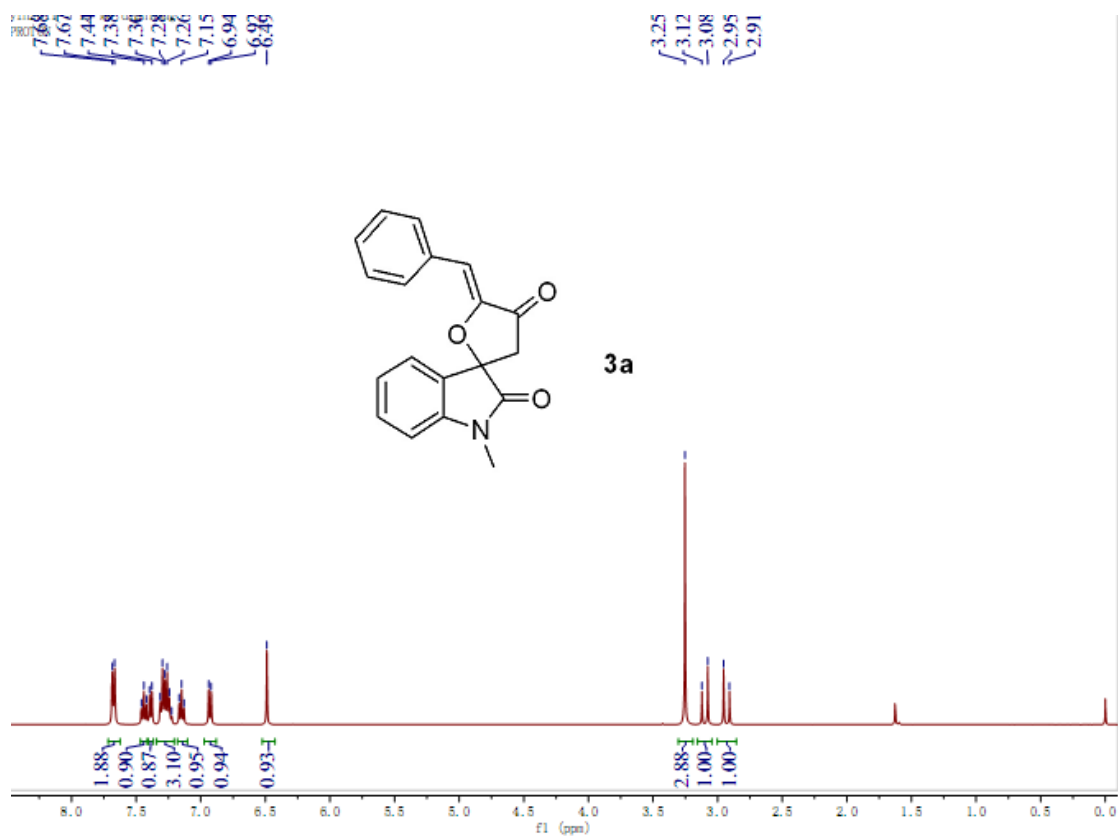

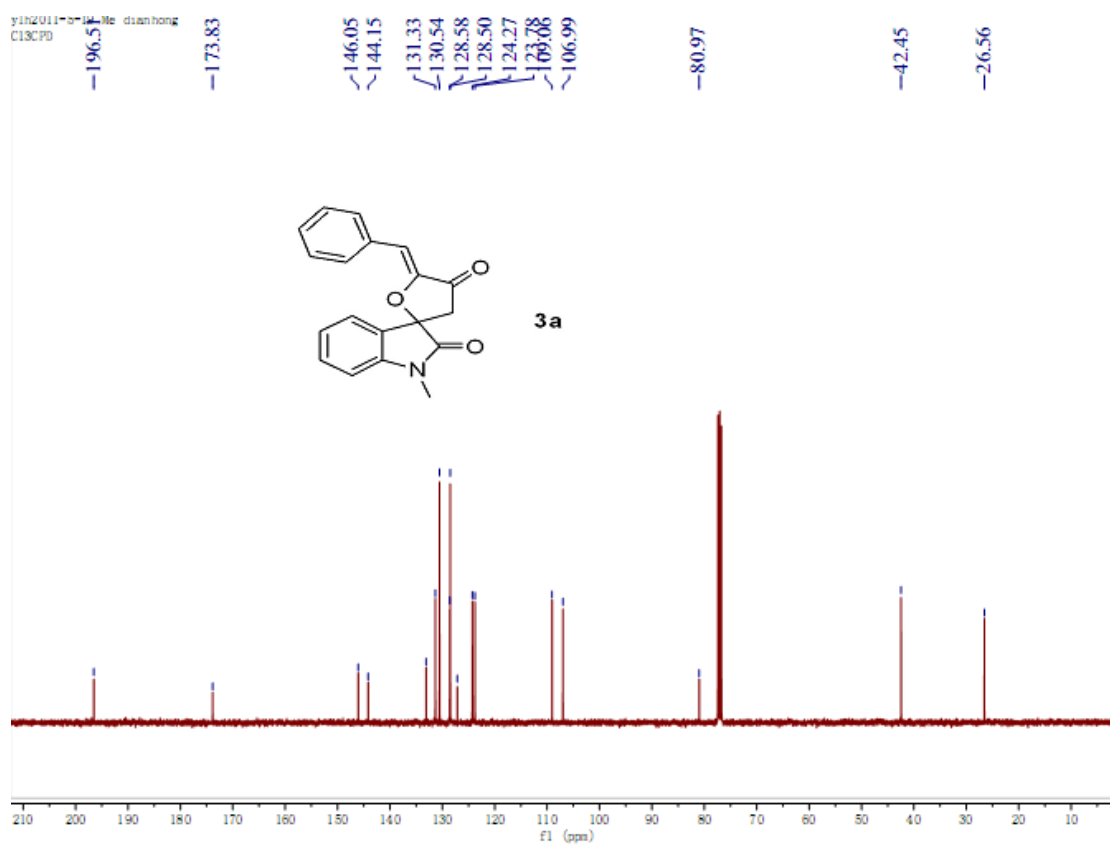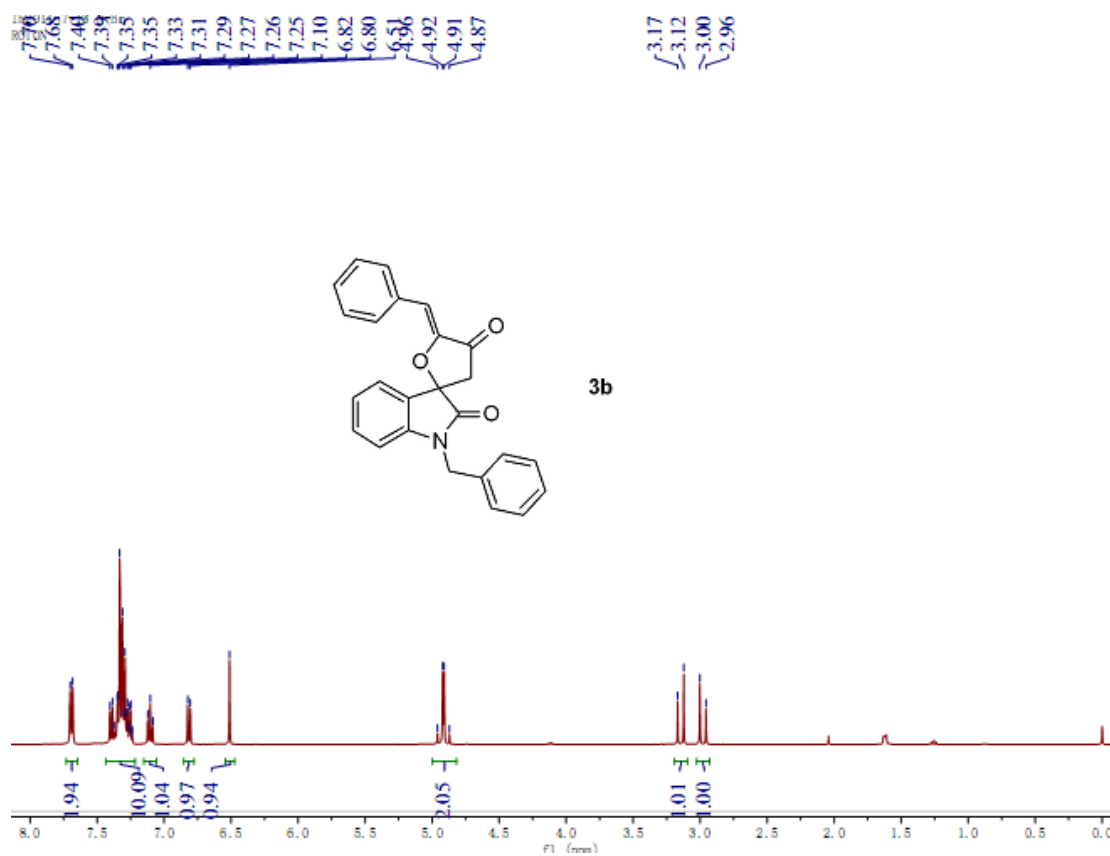

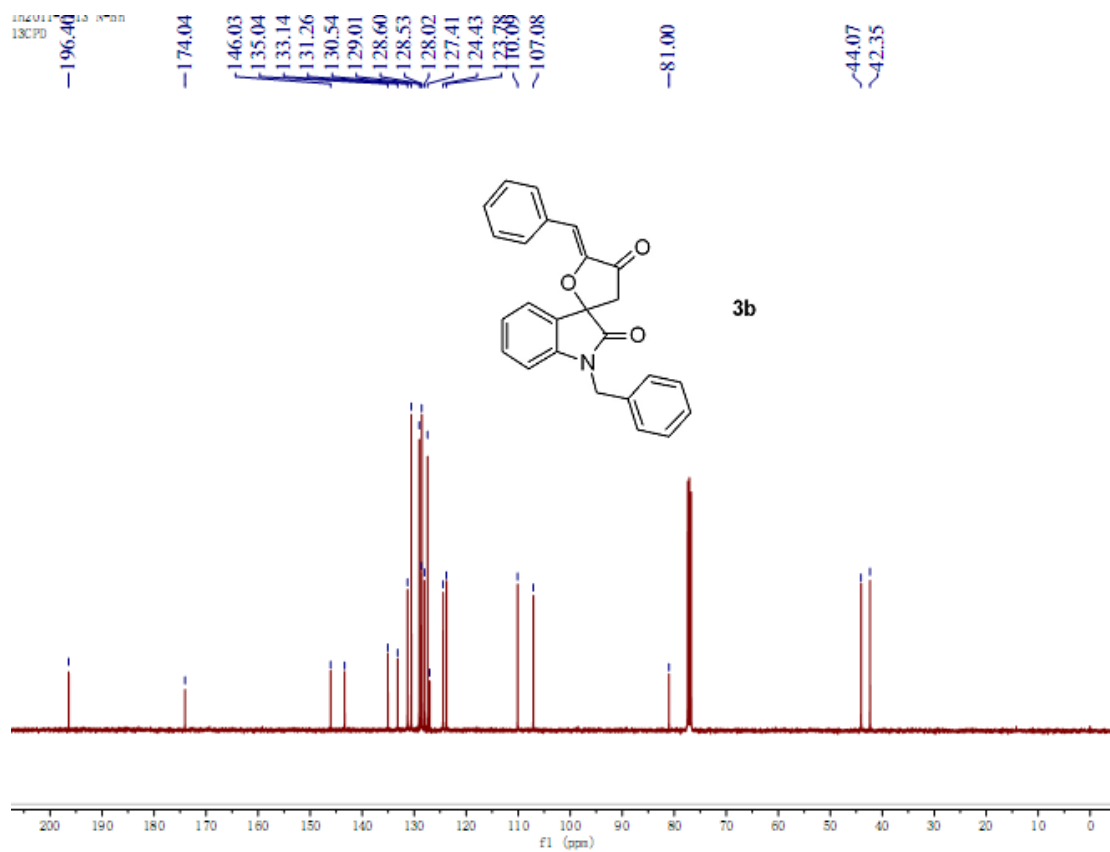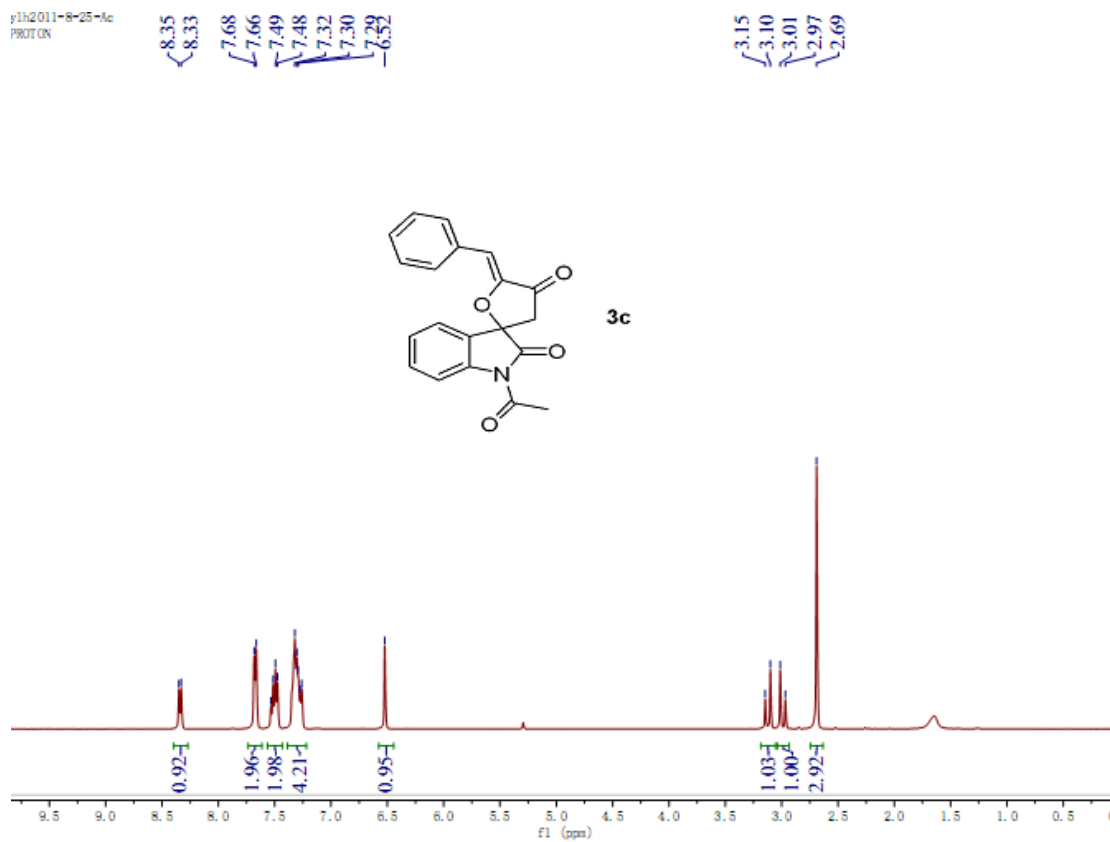

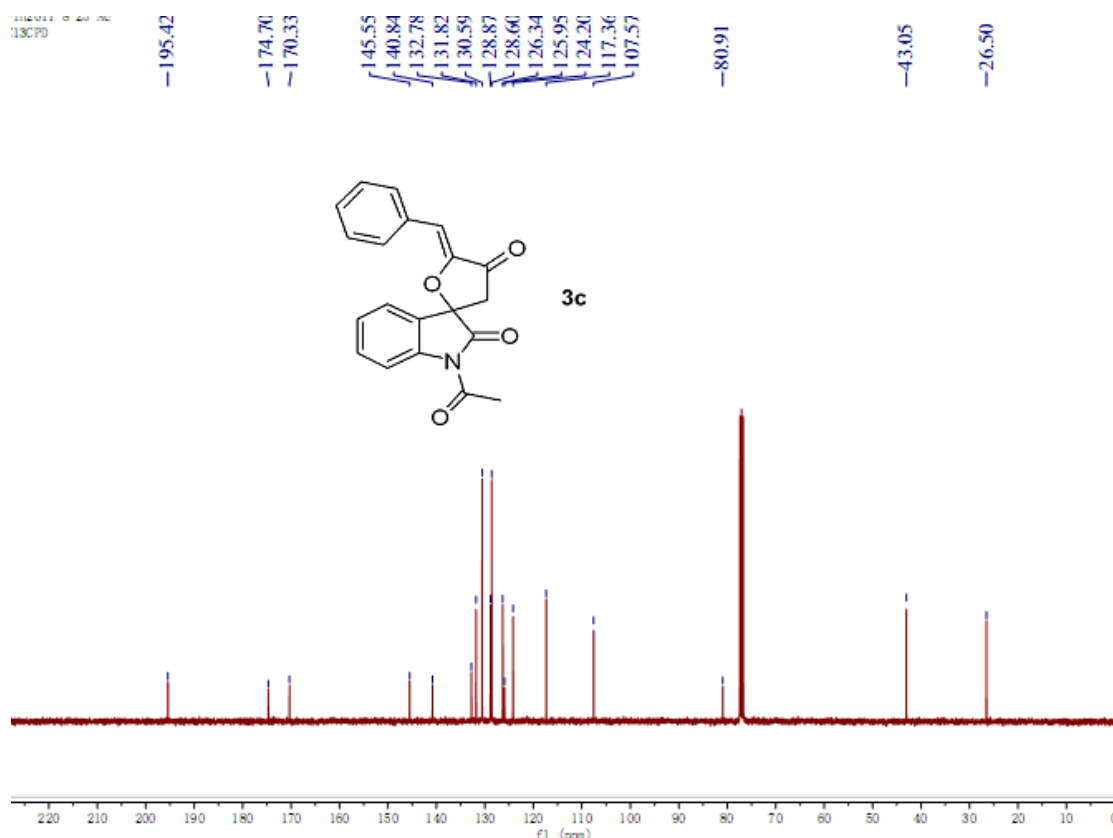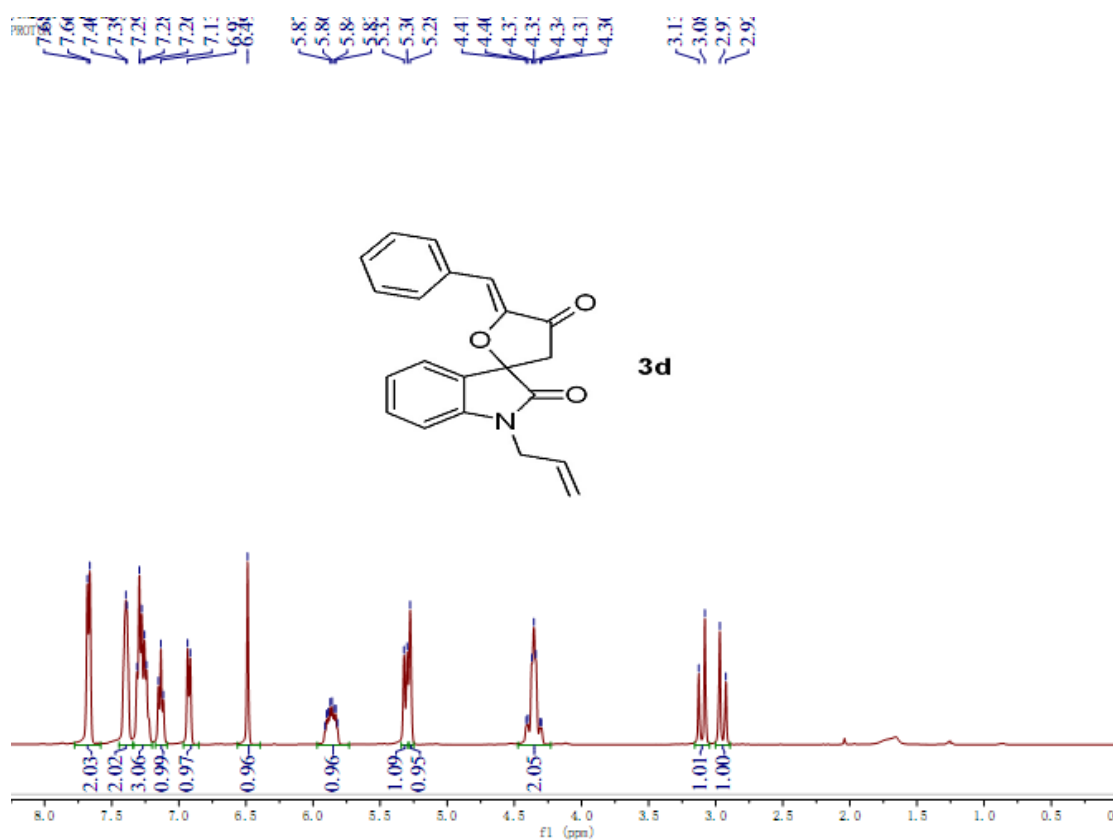

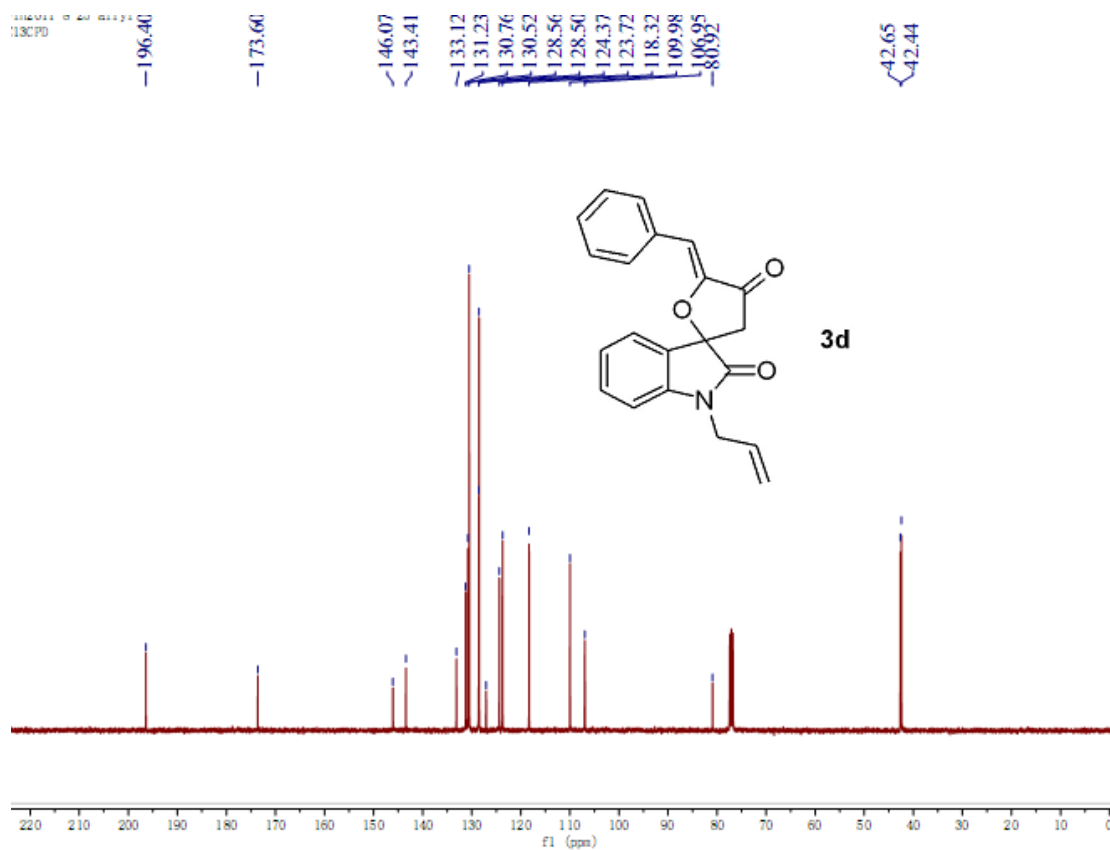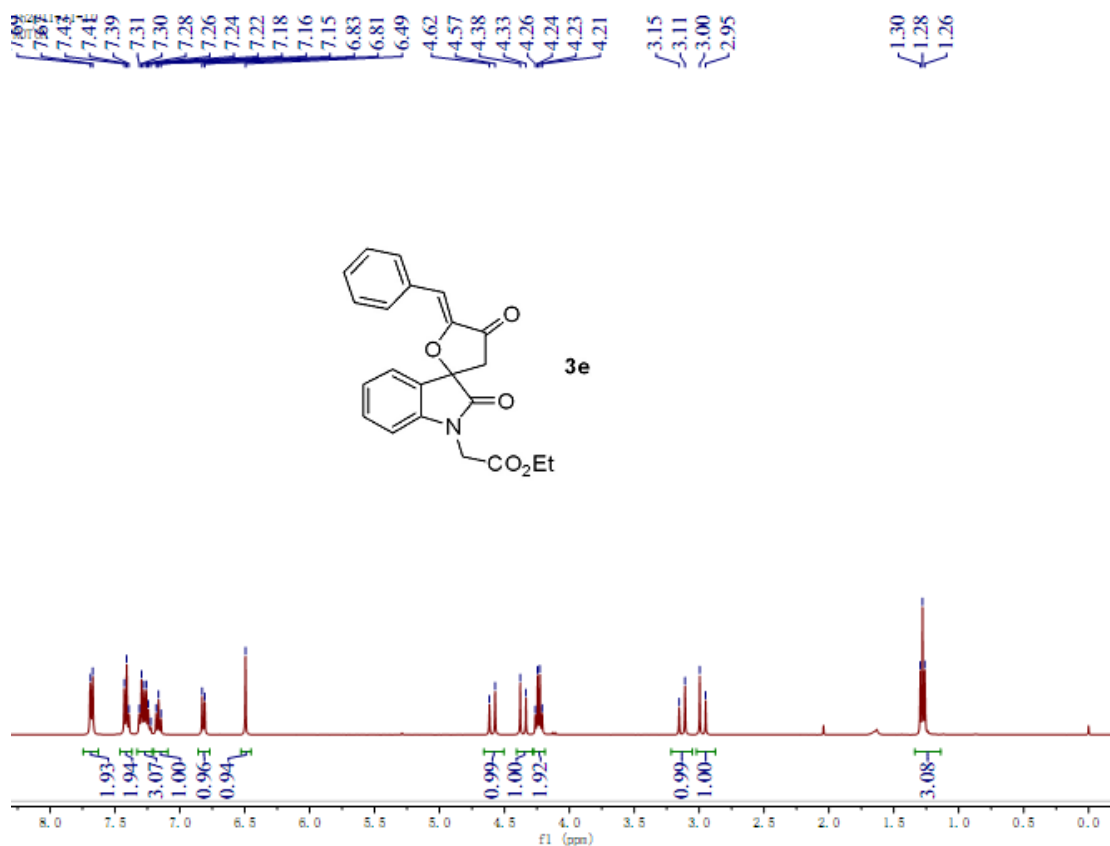

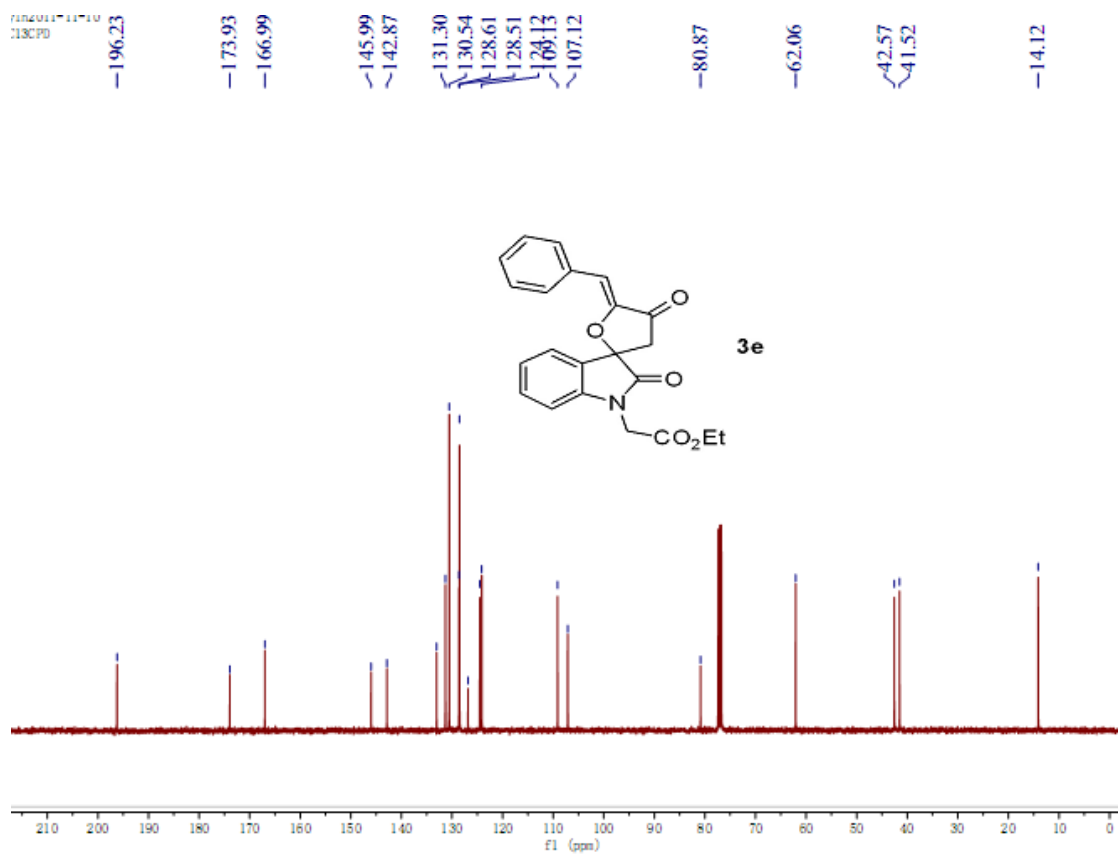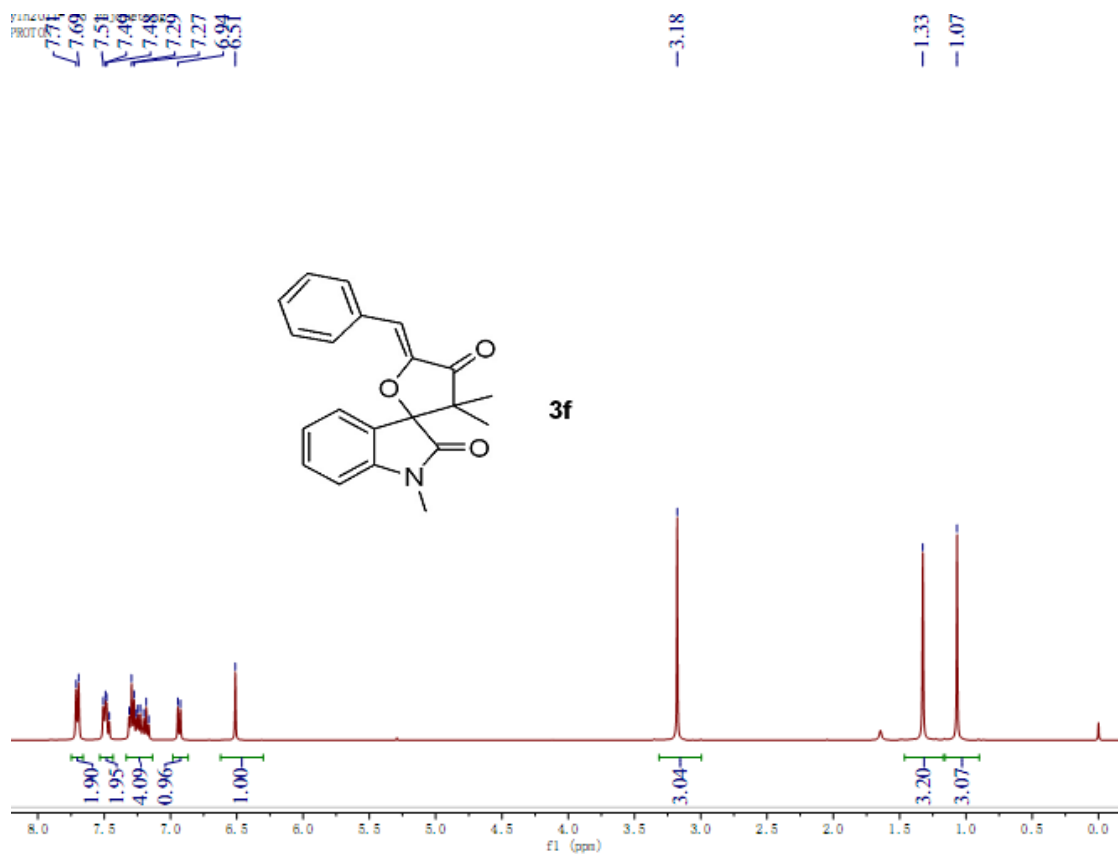

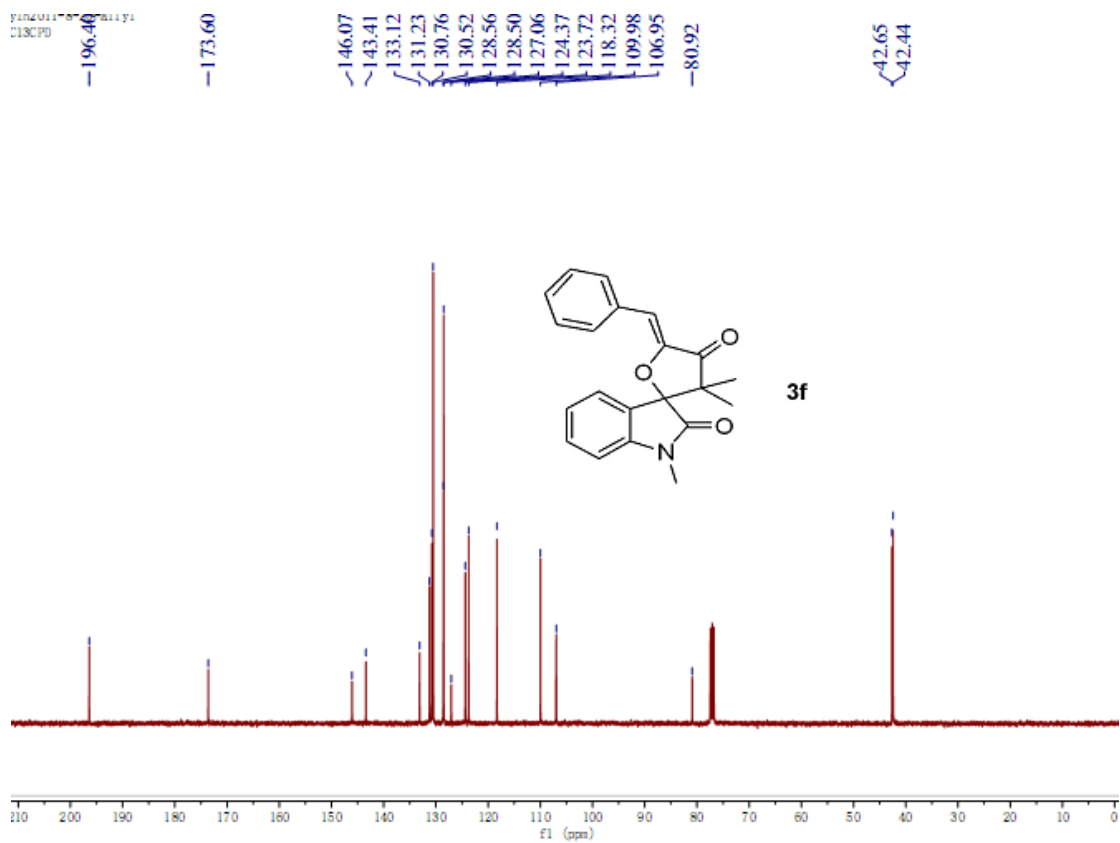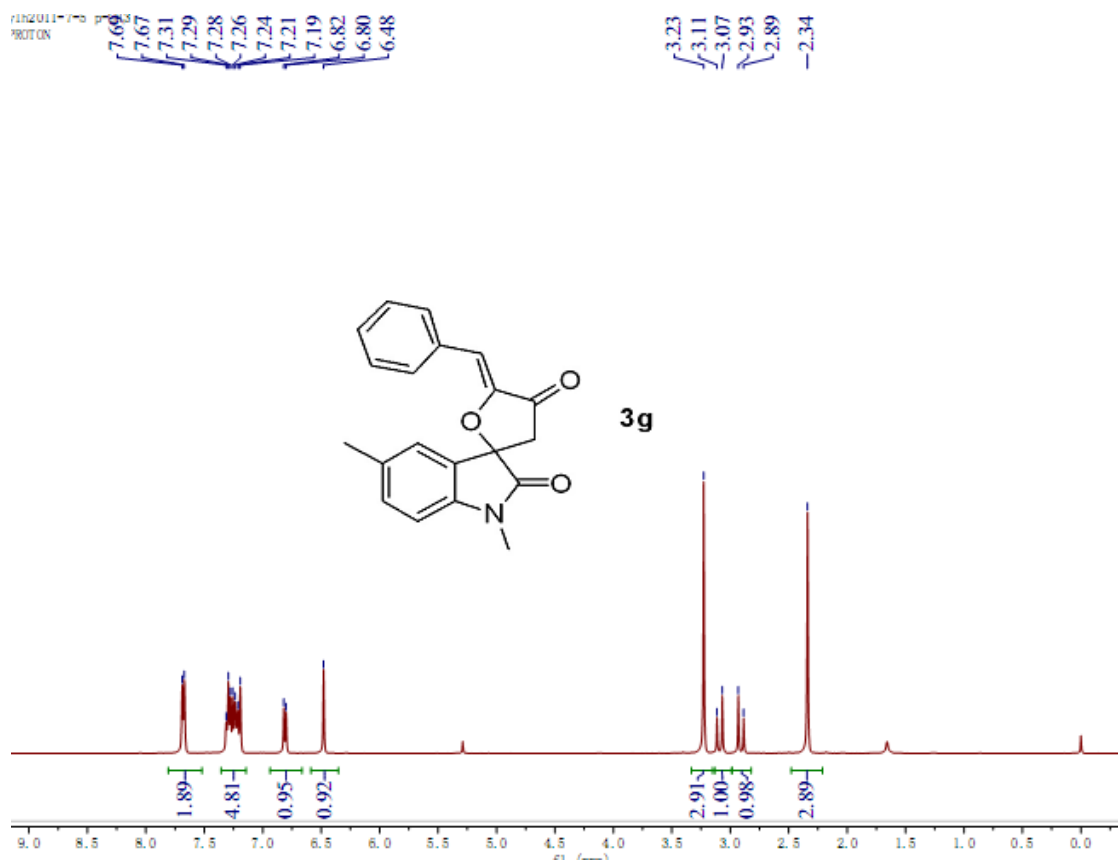



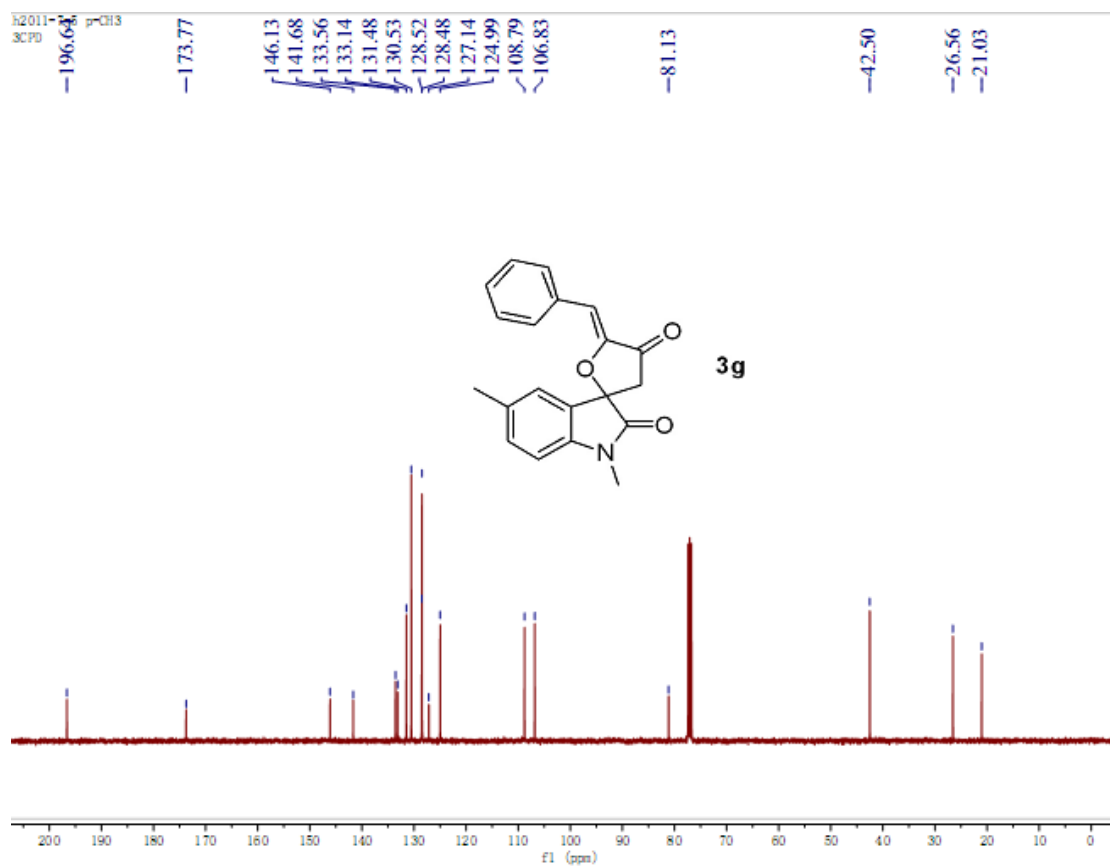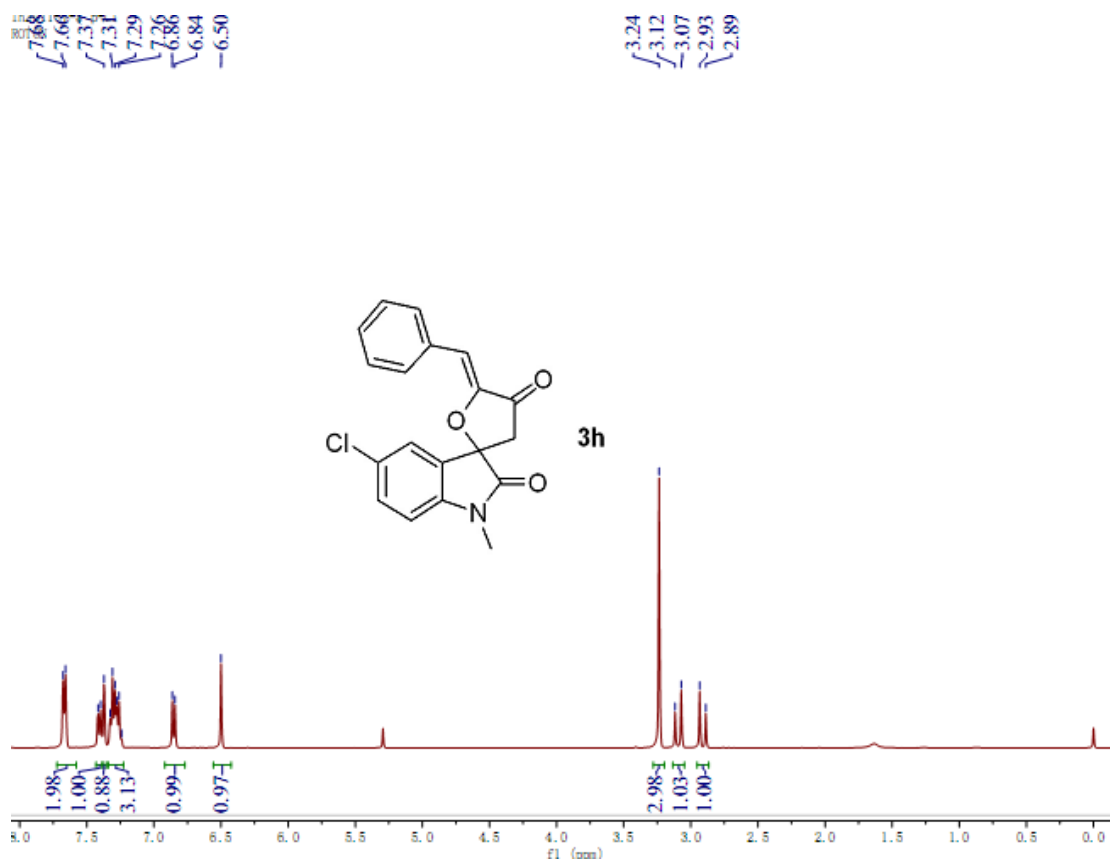

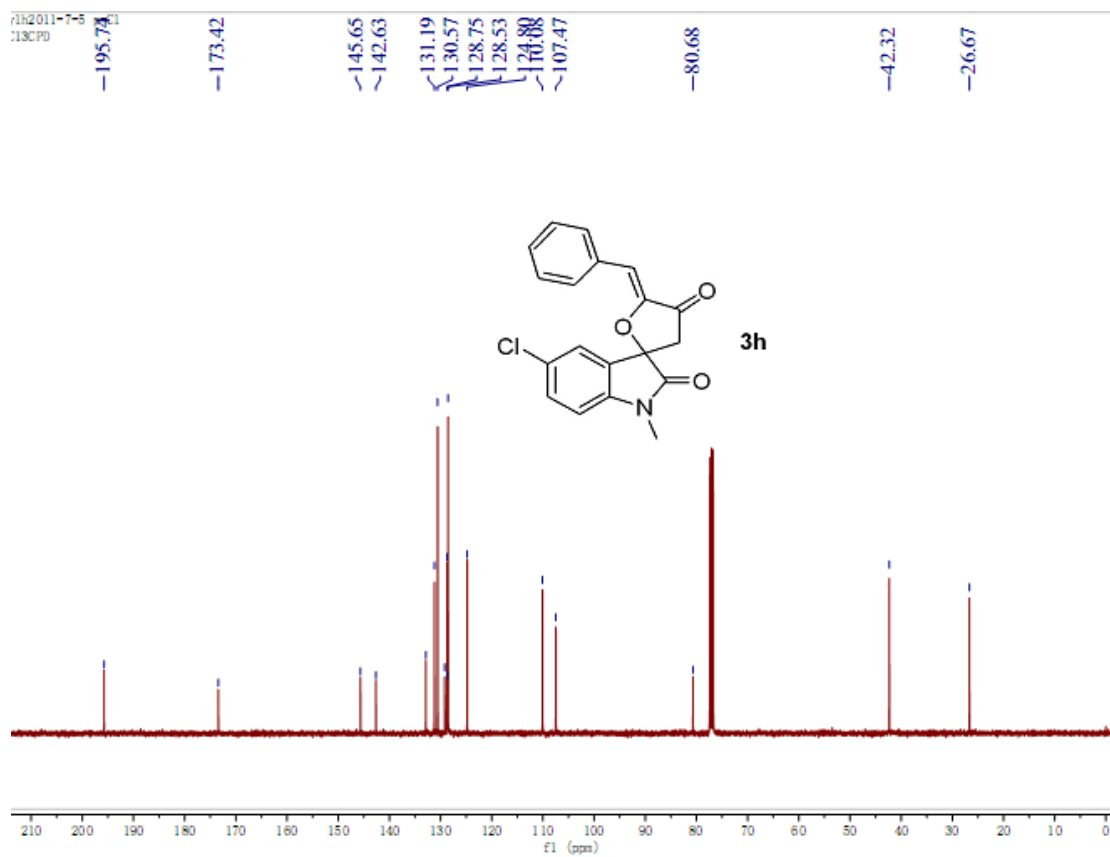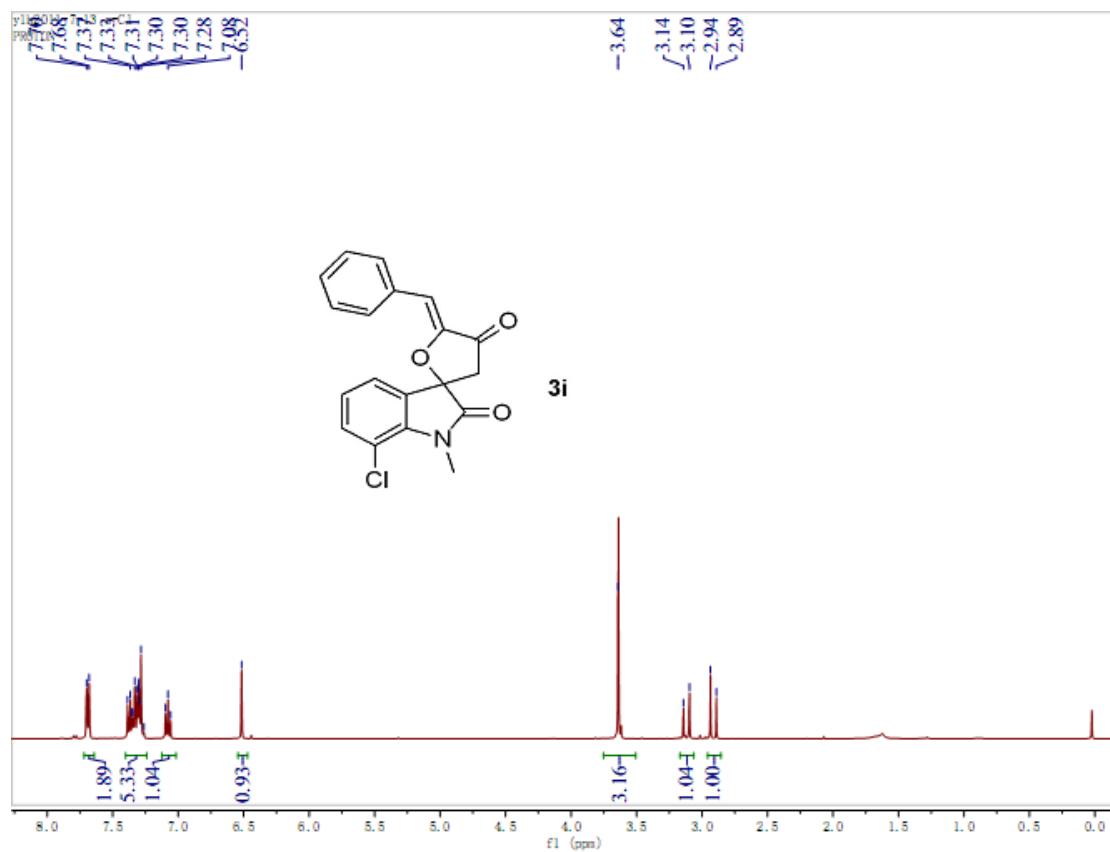

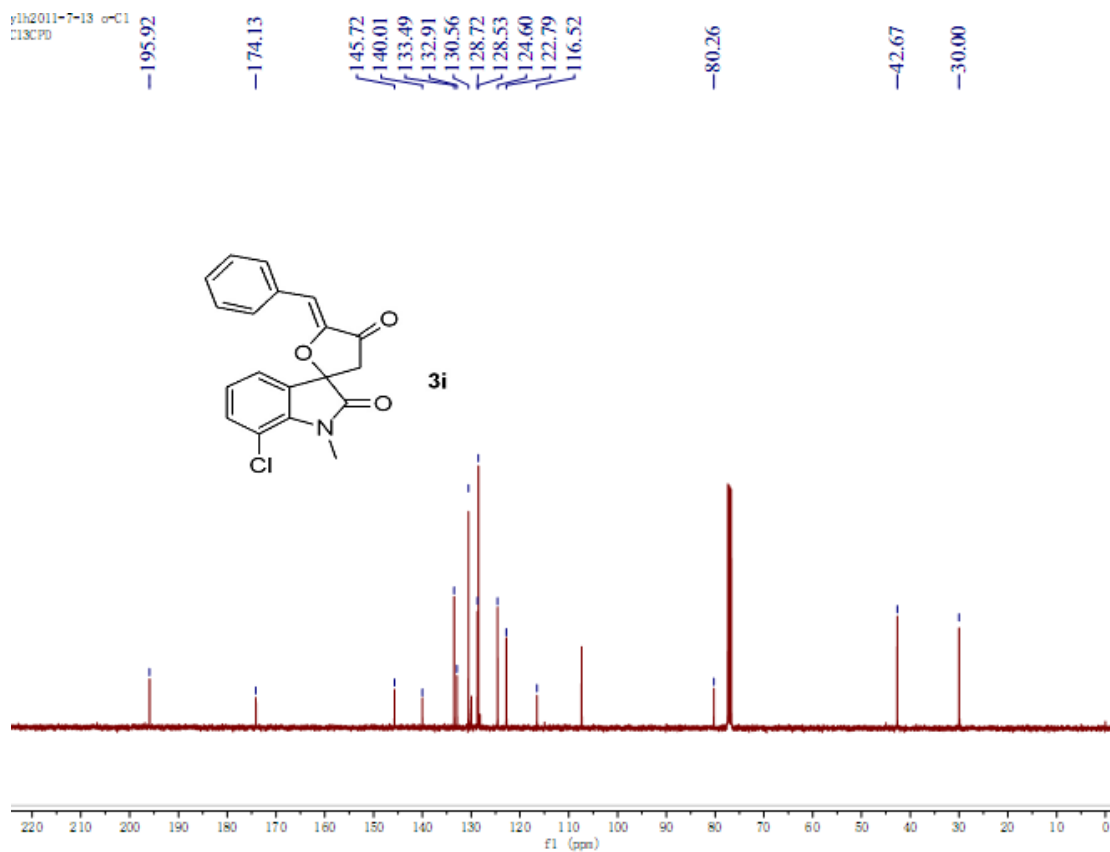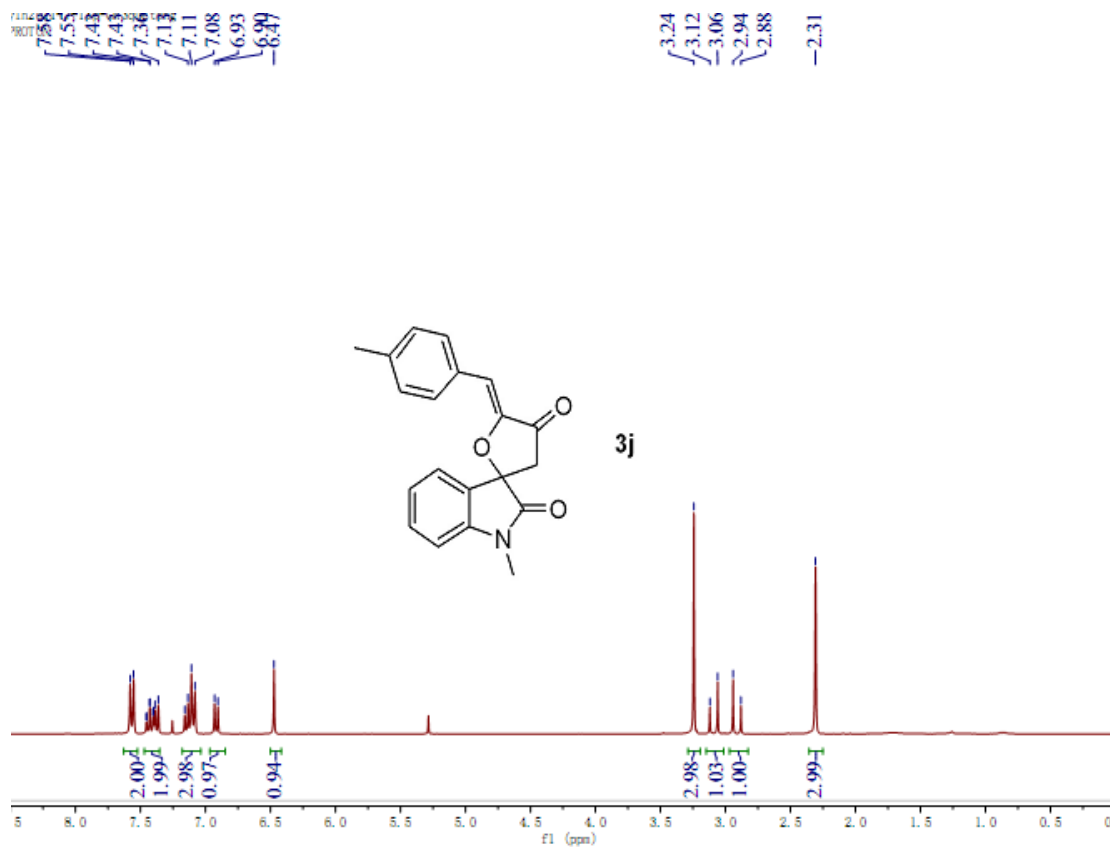

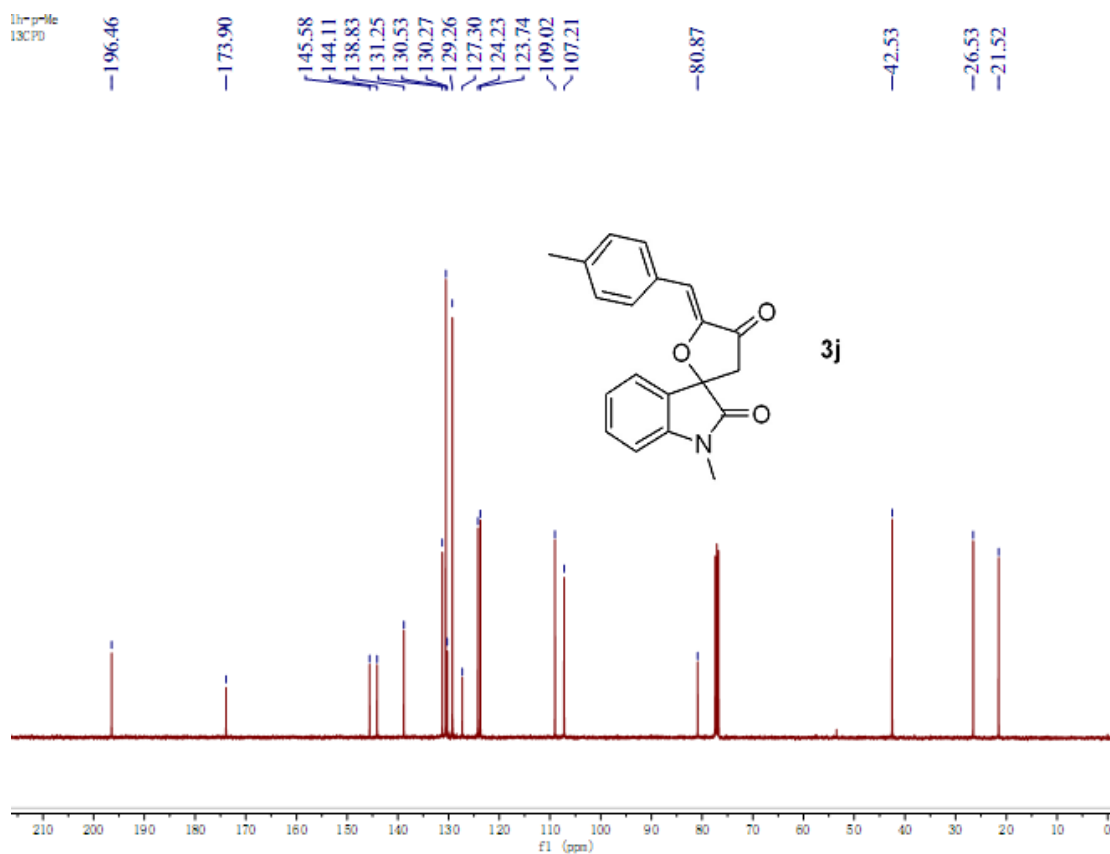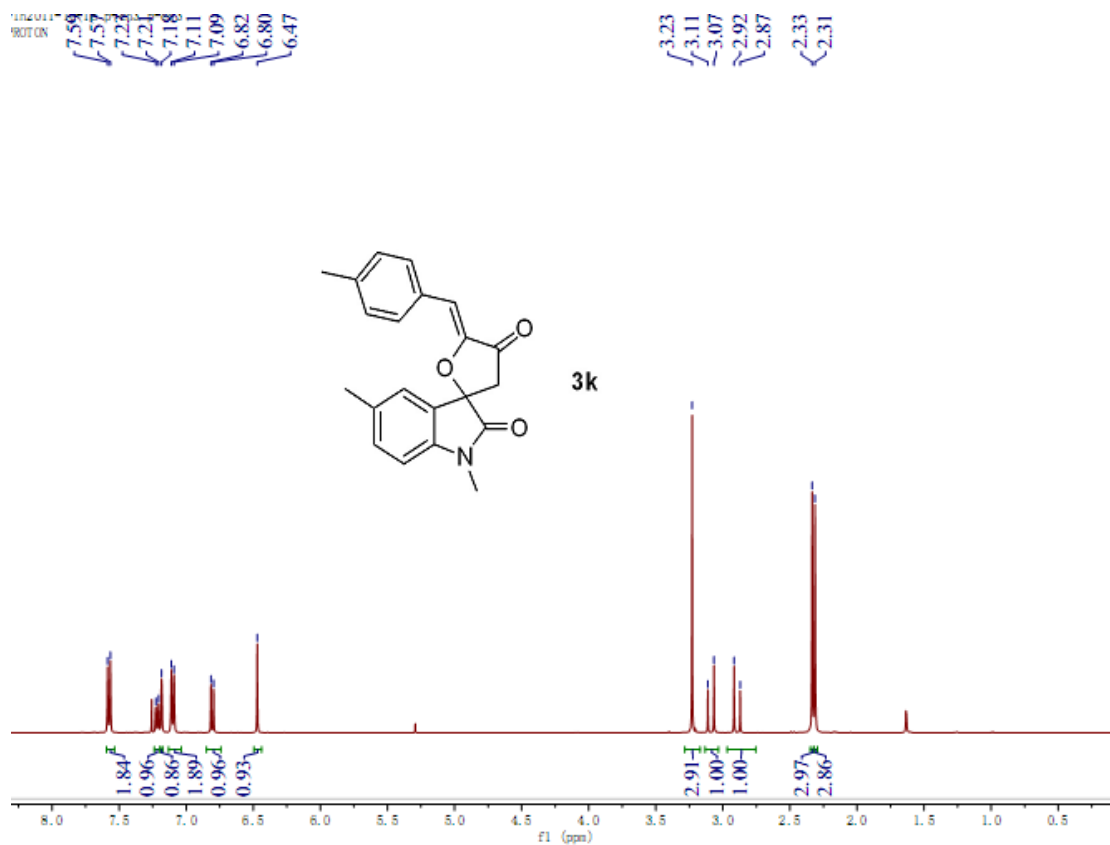

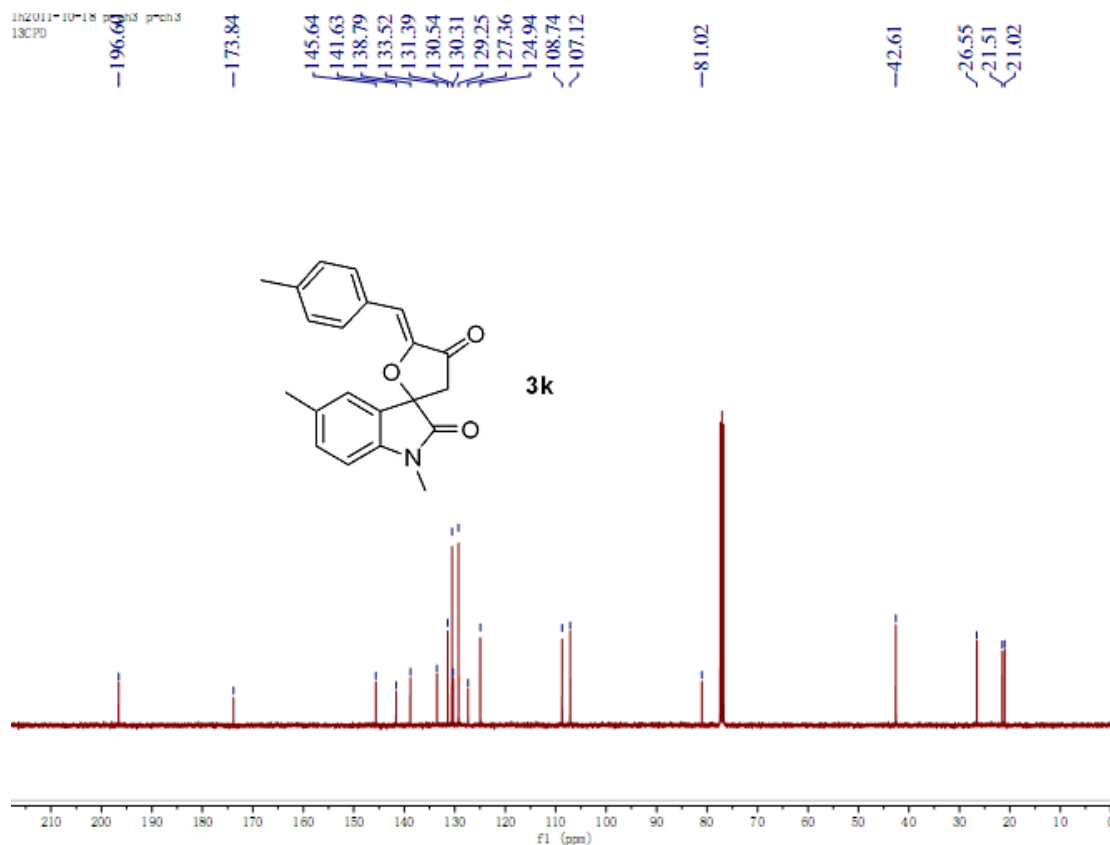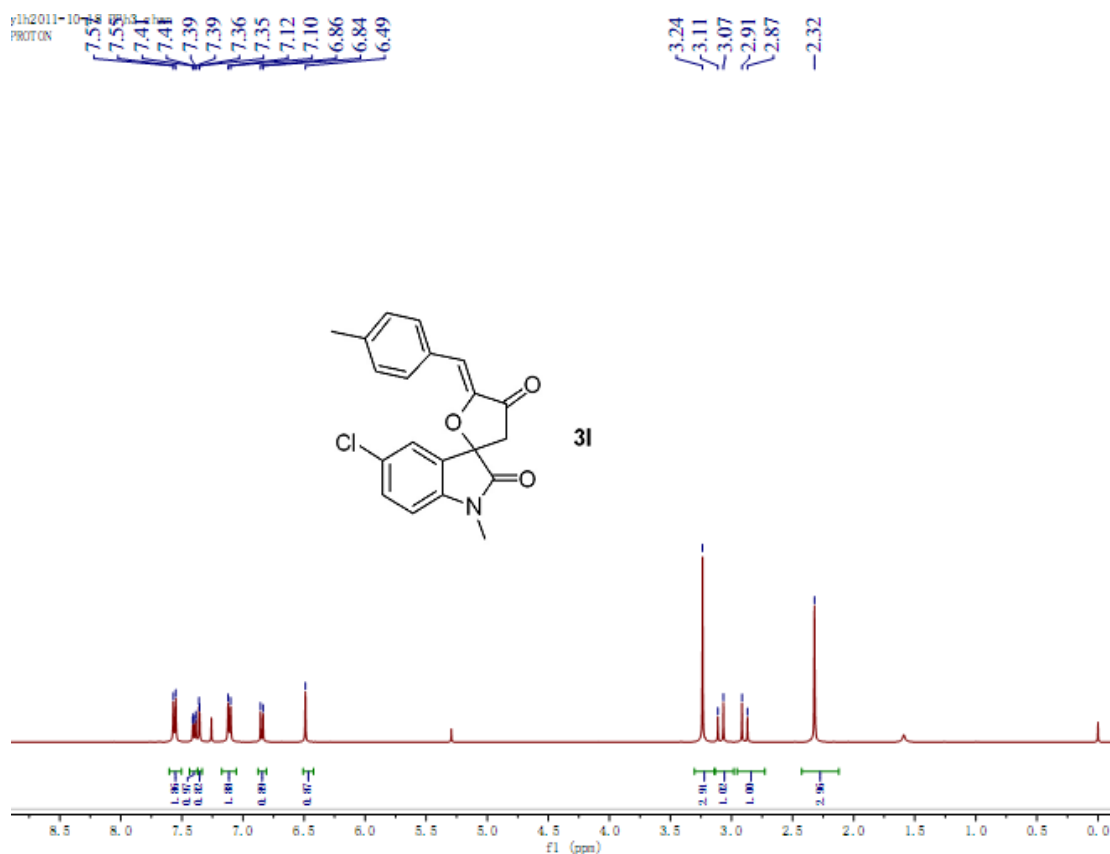

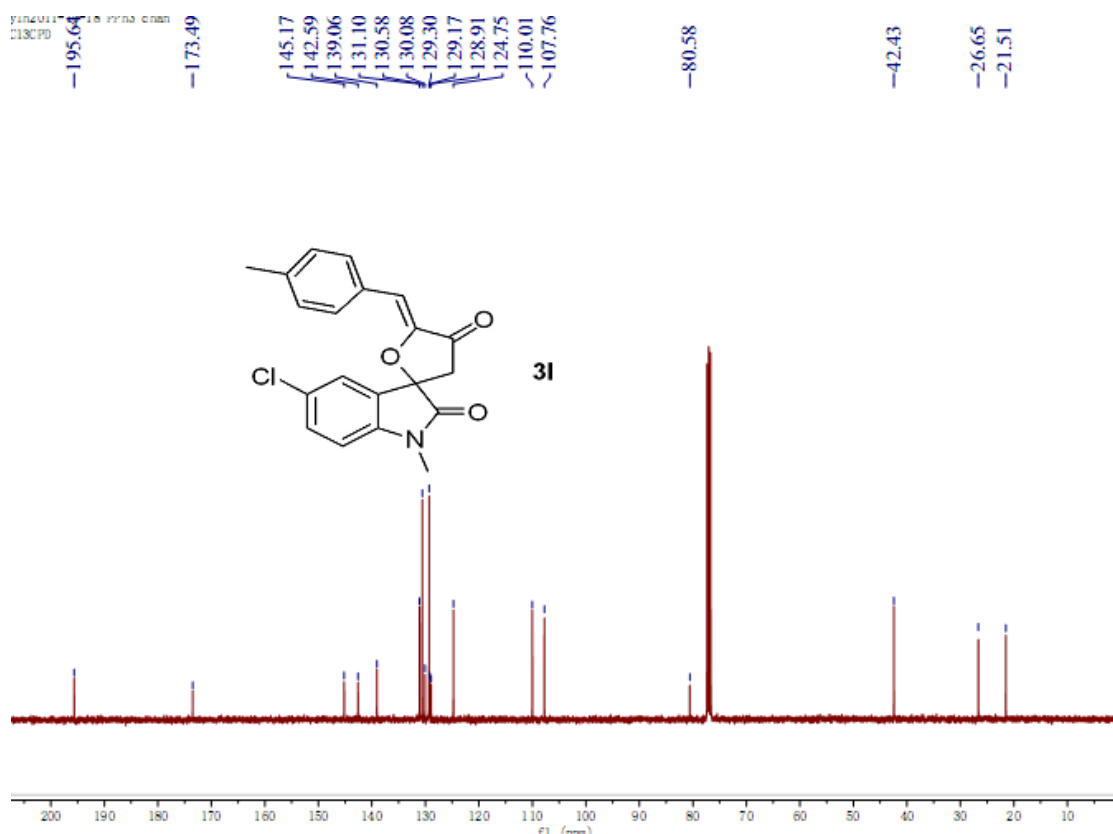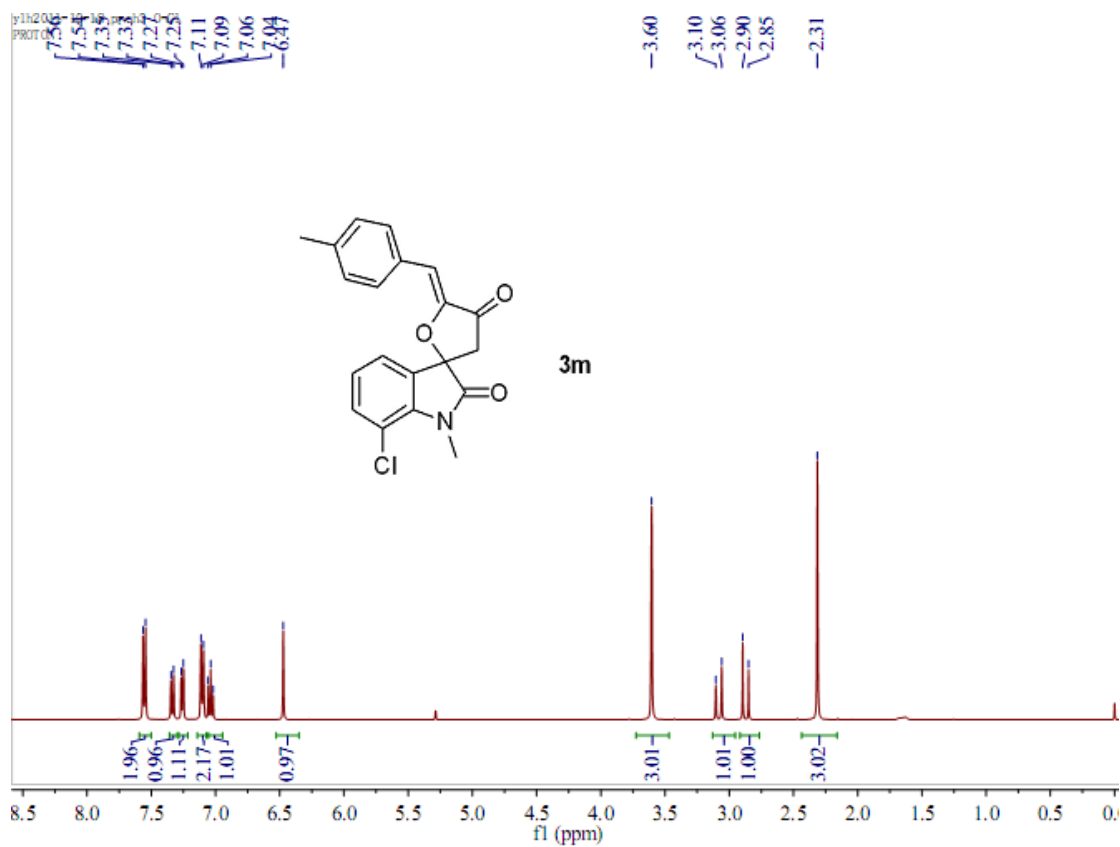

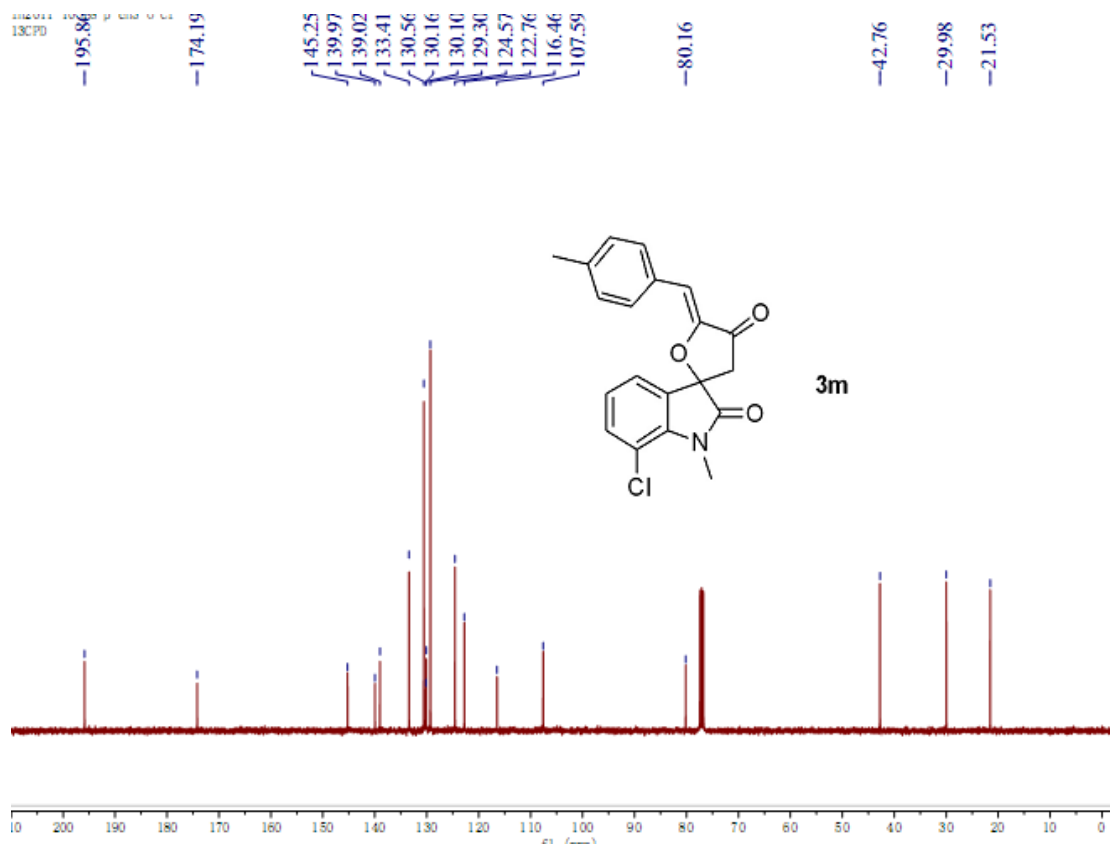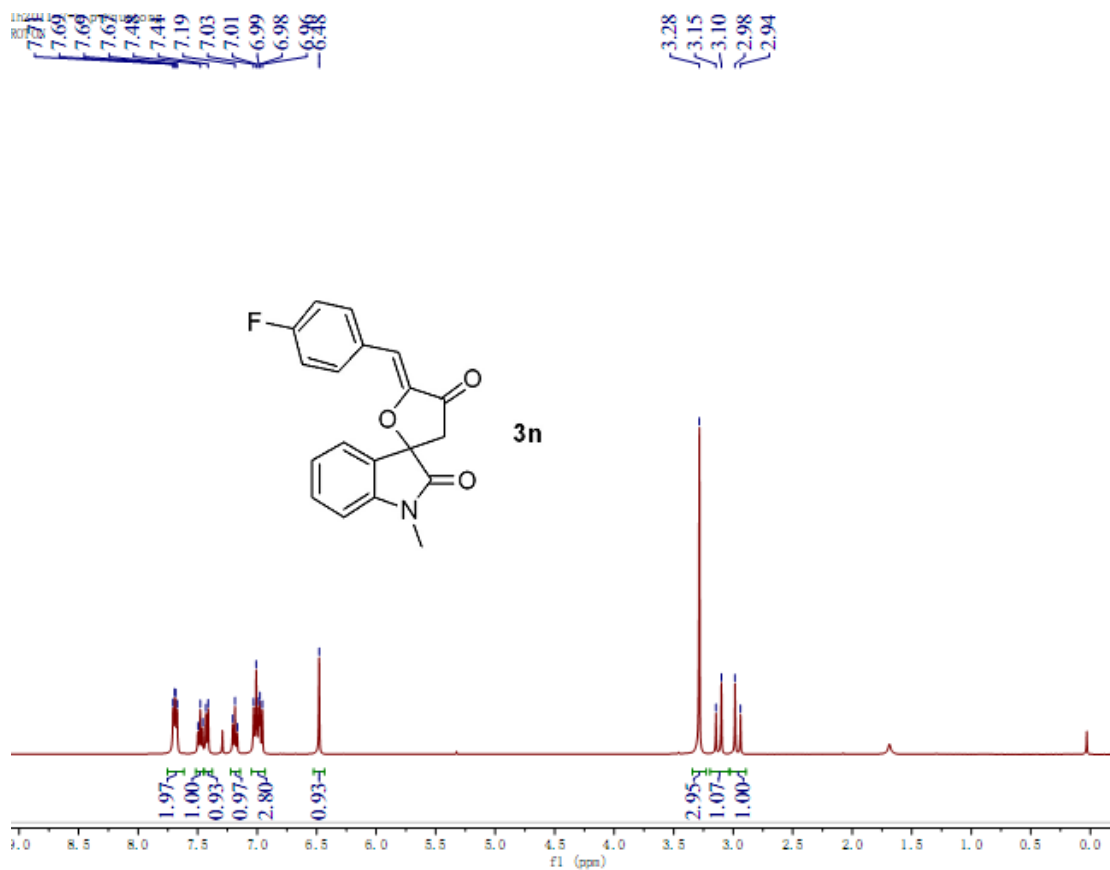

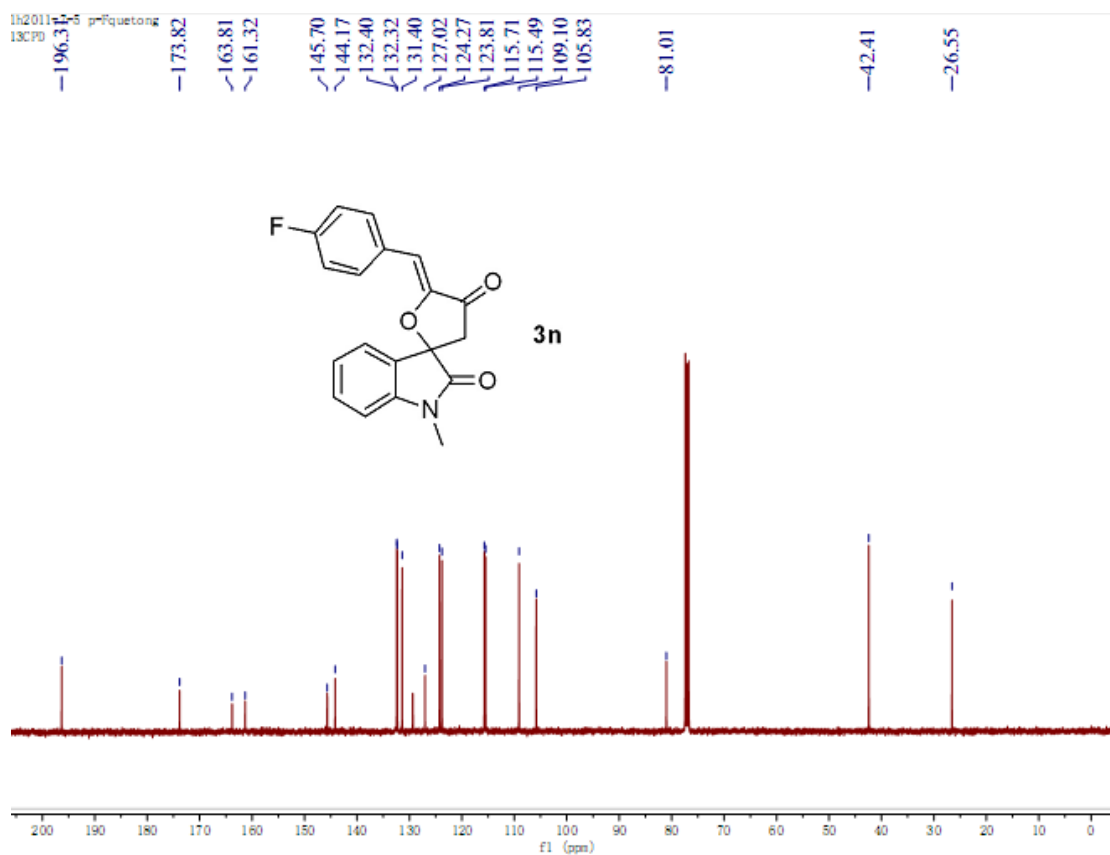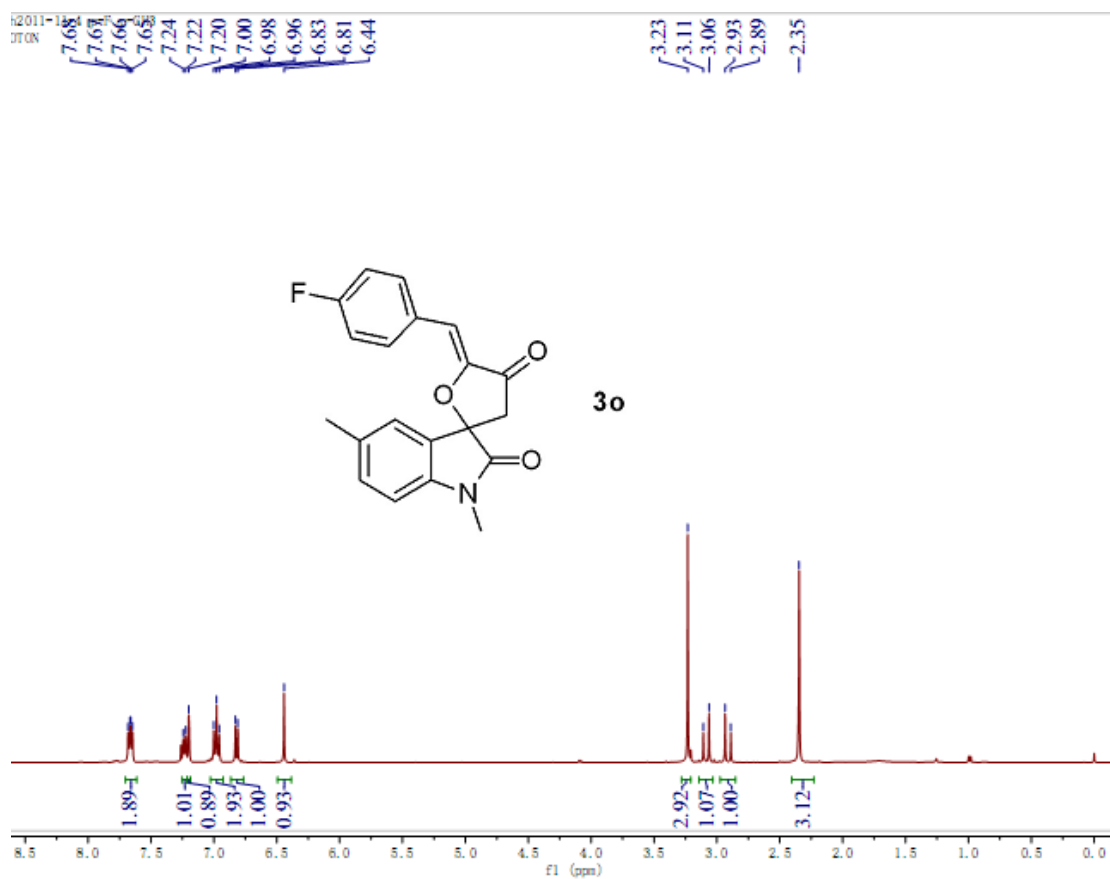



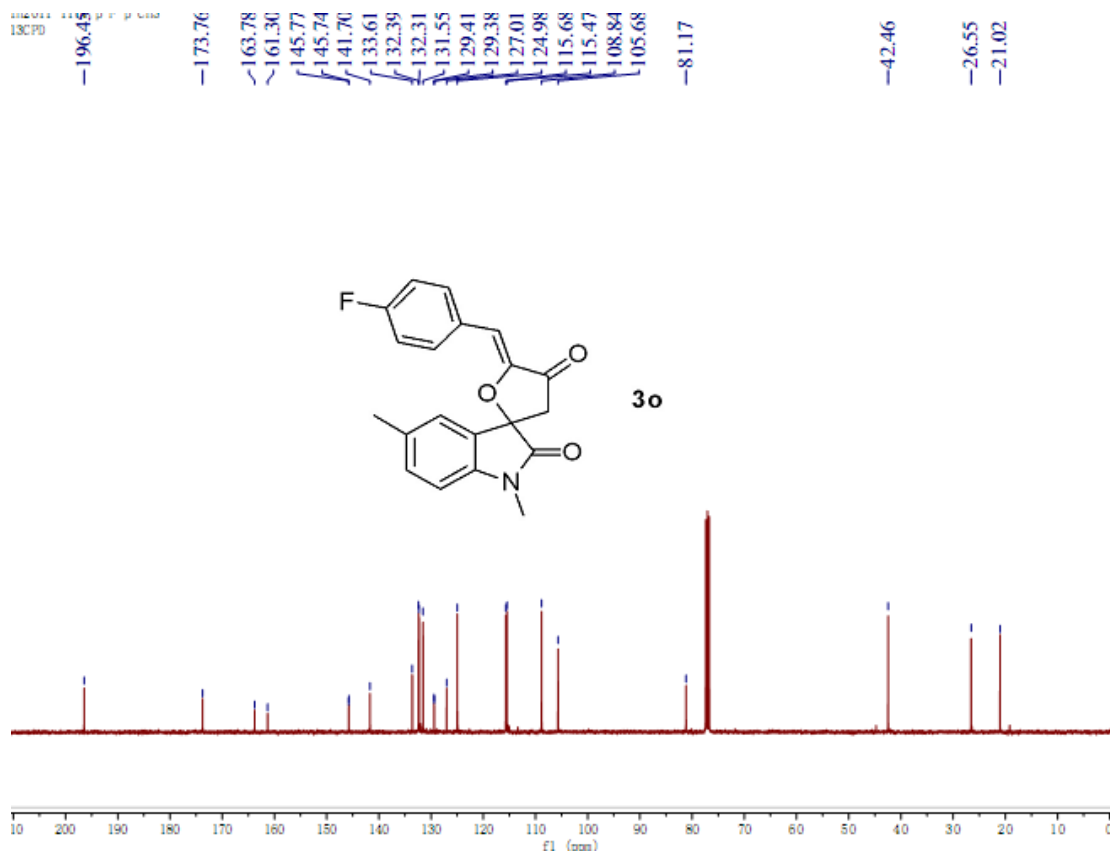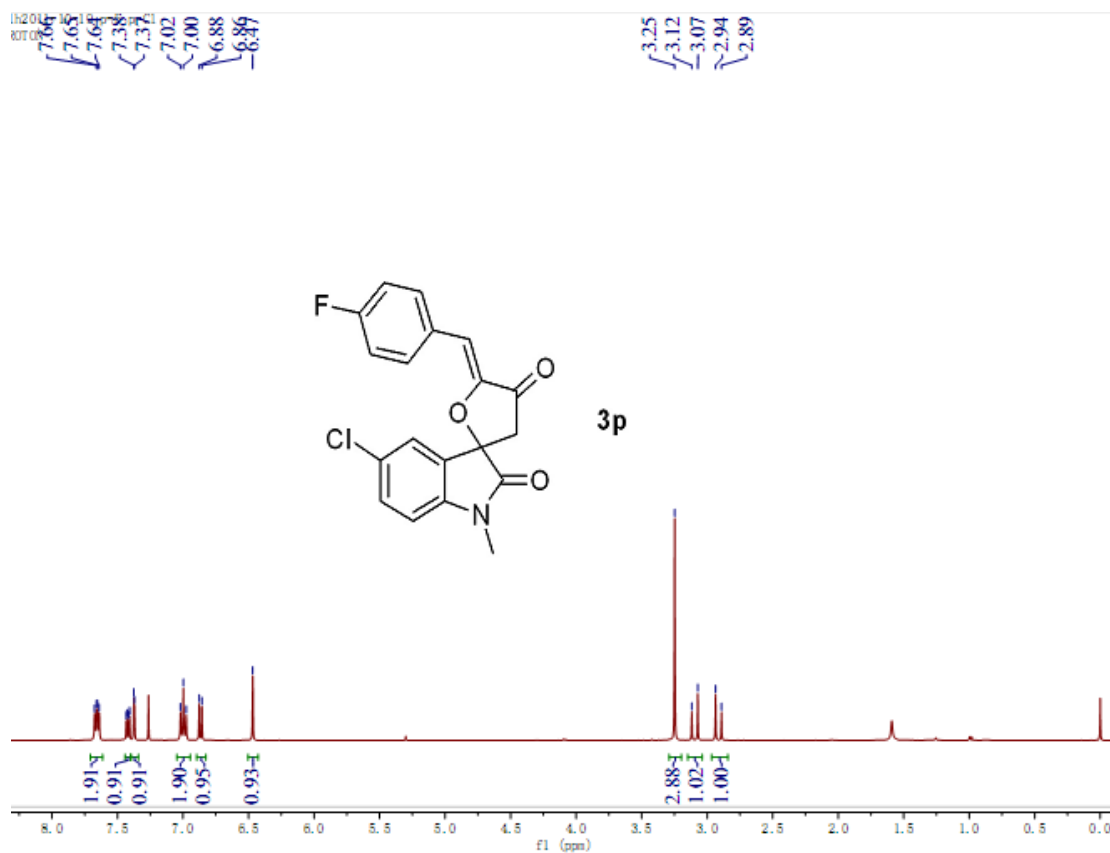

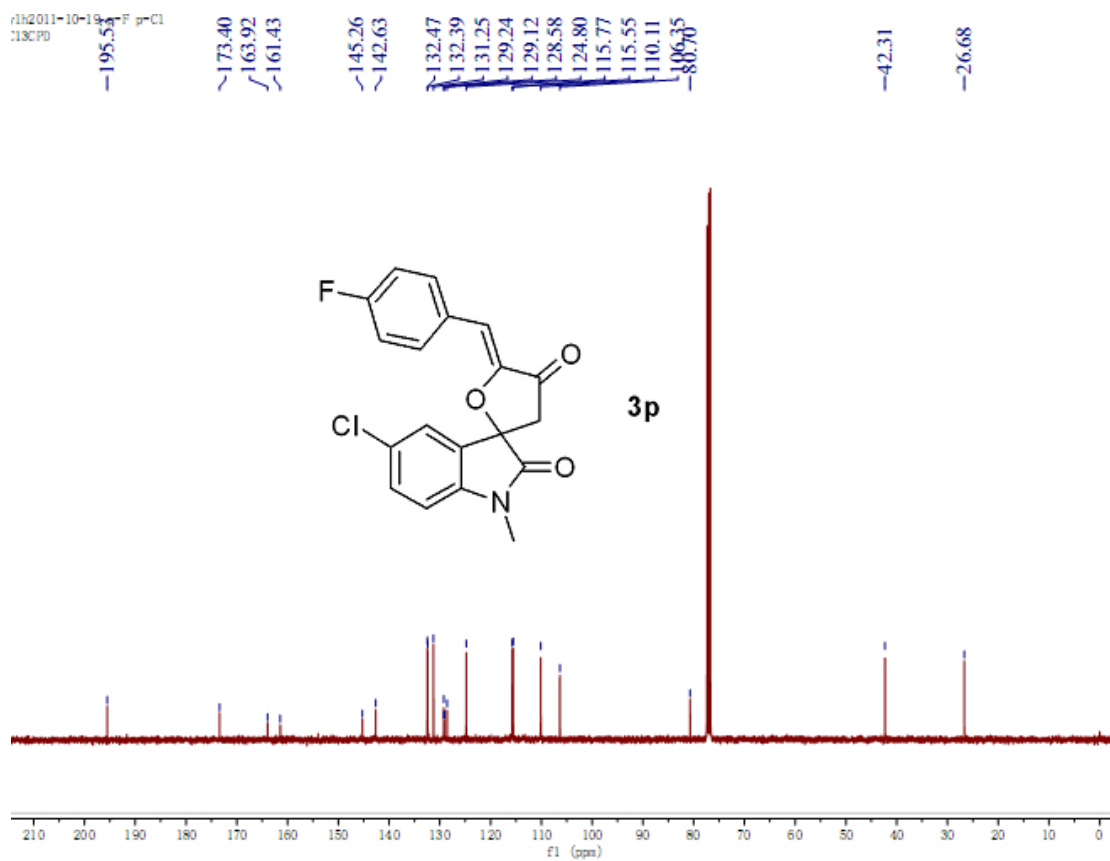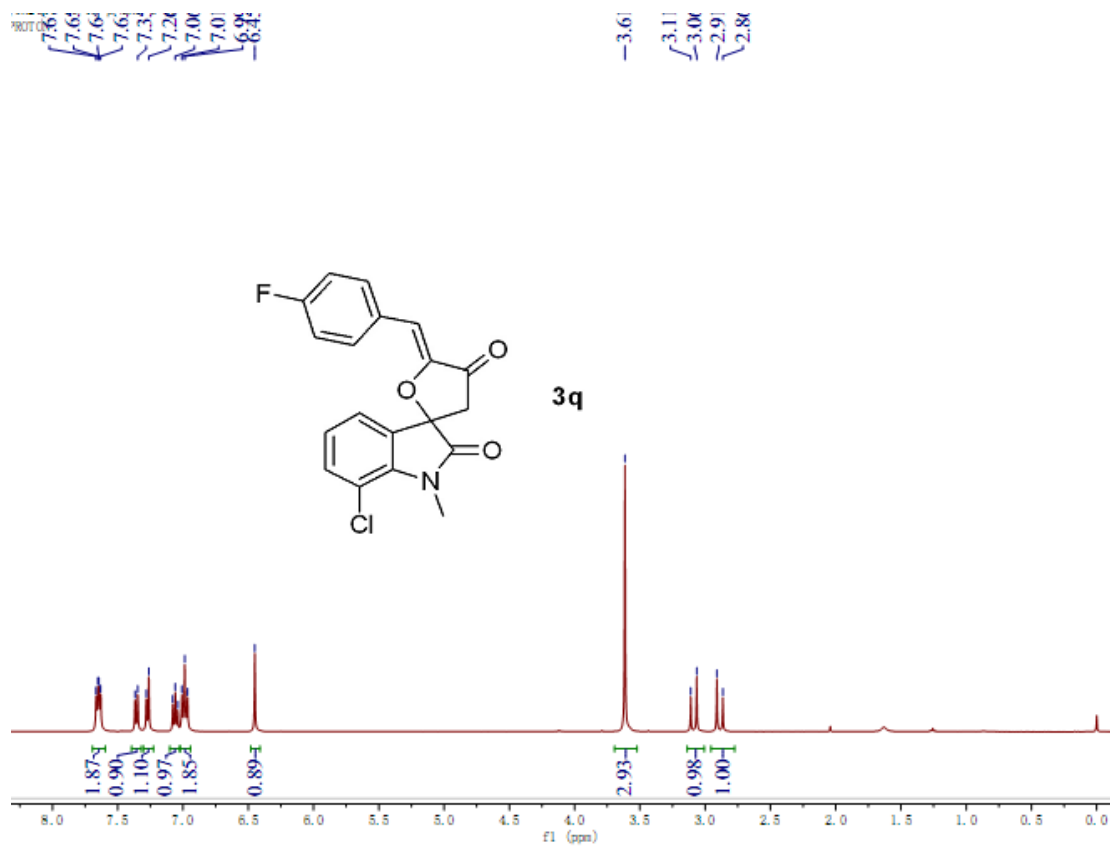

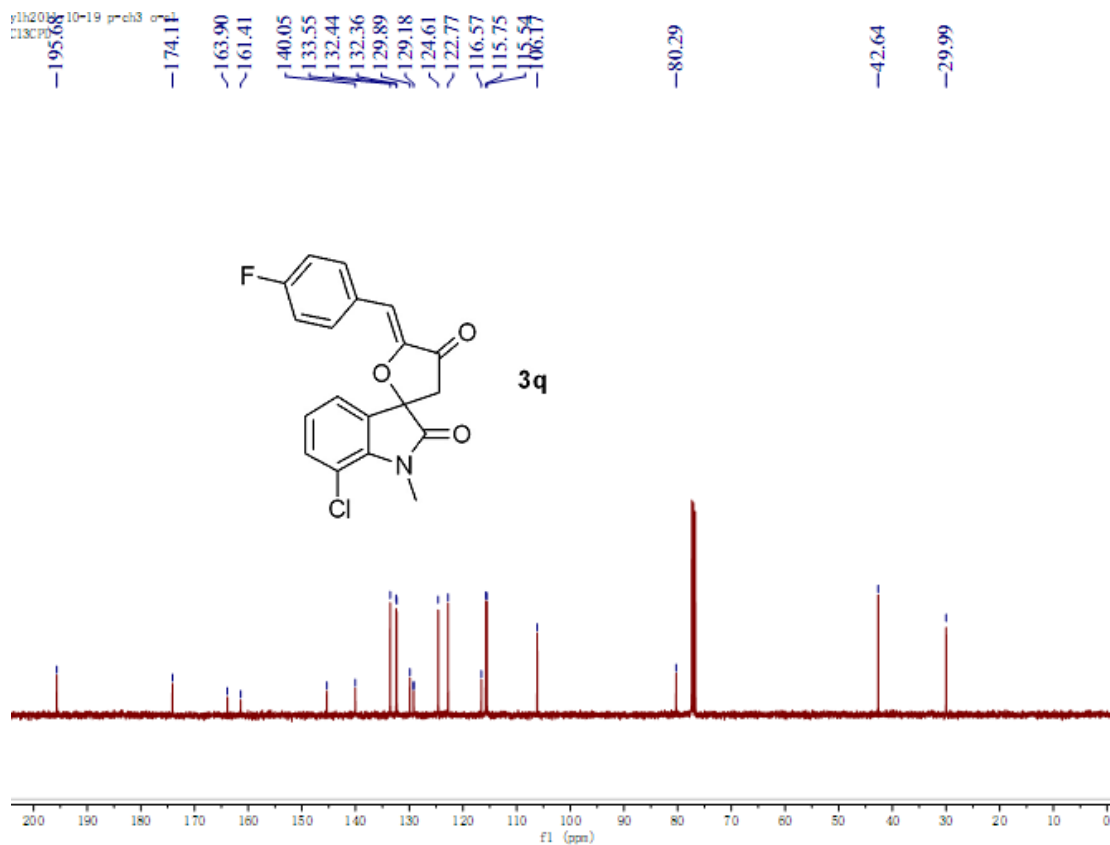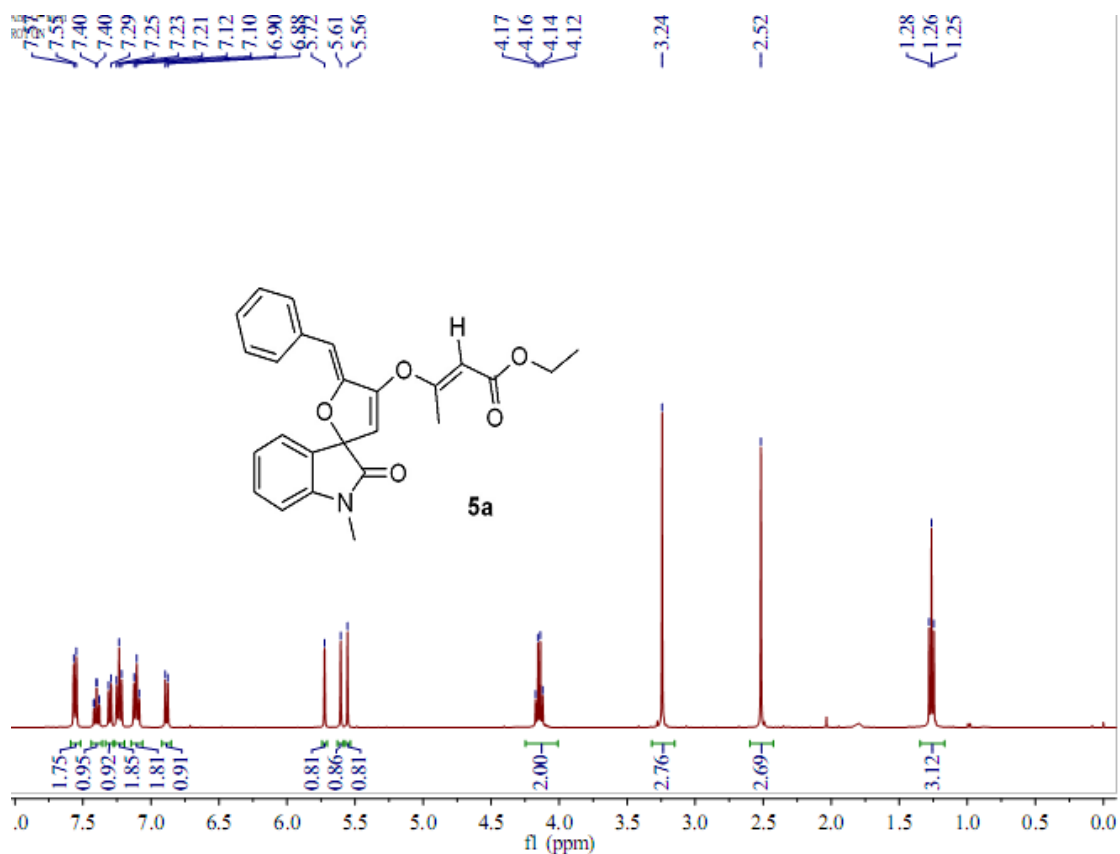

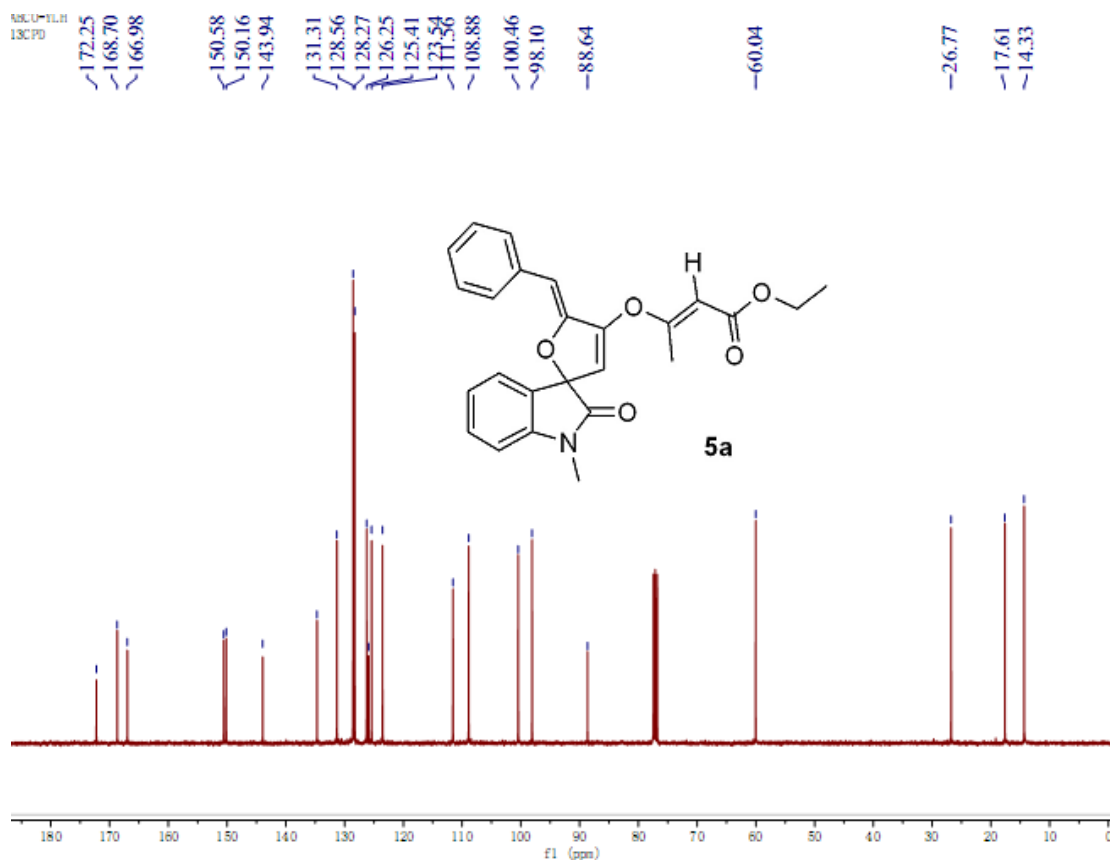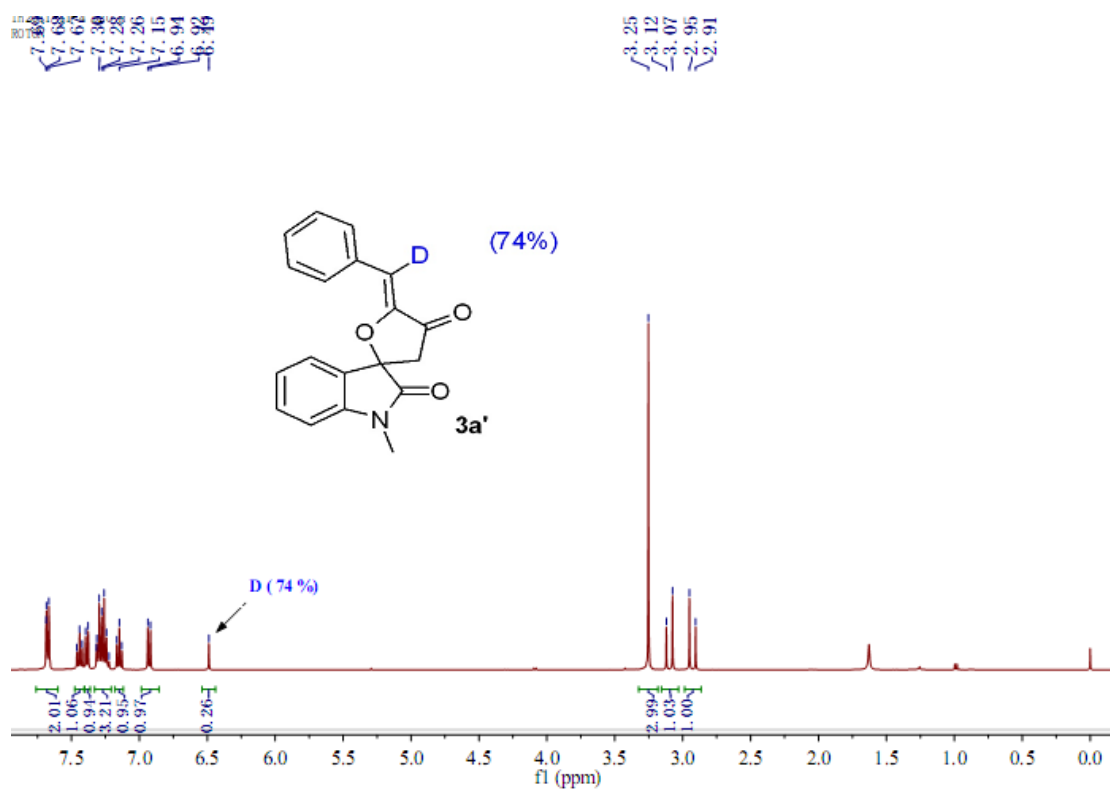

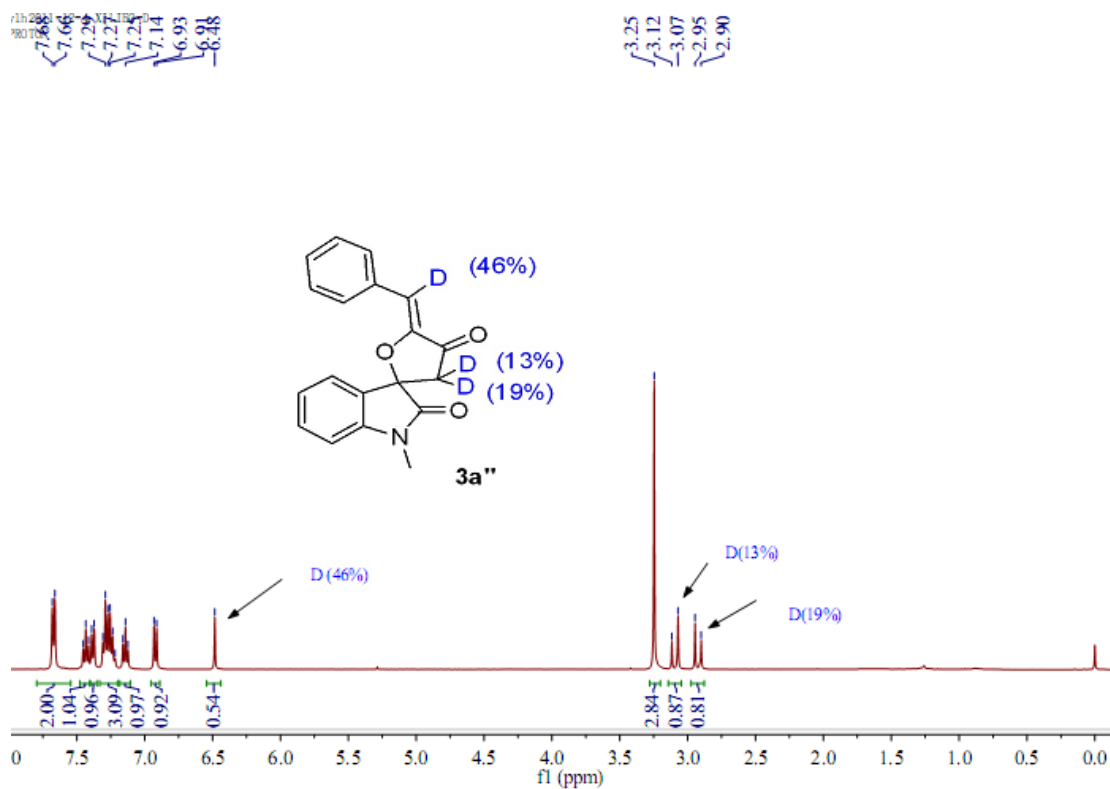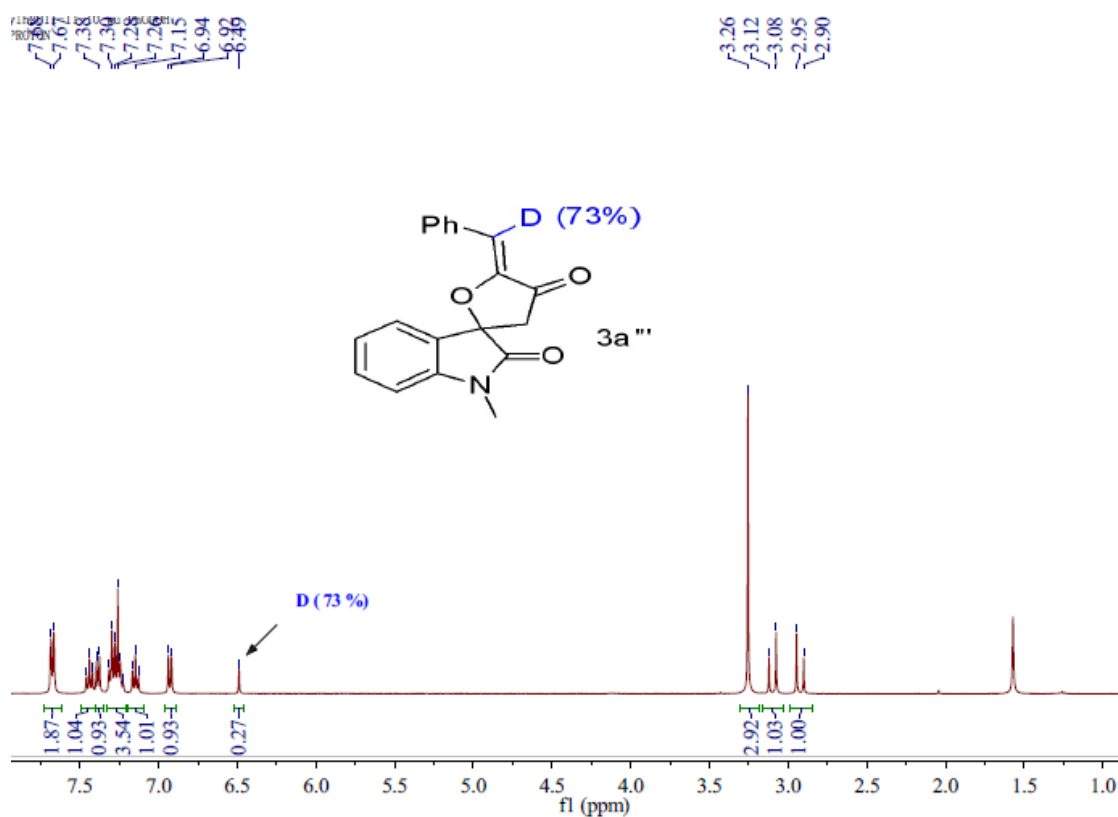

## 2. Chiral HPLC analyses (3a)

数据文件: D:\CHEM32\2\DATA\12-HY\X-6-20-X.D

=====  
操作者 :  
仪器 : 仪器 2 位置 : 样品瓶 1  
进样日期 : 2012-6-20 9:00:50 上午  
采集方法 : D:\CHEM32\2\DATA\10-YING\M100604A-C.D\DA.M  
最后修改 : 2012-6-20 8:39:58 上午  
(调用后修改)  
分析方法 : D:\CHEM32\2\DATA\10-YING\M100604A-C.D\DA.M  
最后修改 : 2012-6-19 11:41:47 上午  
样品信息 : AD-H Hexane:Isopropanol=70:30 1.0mL/min 53bar  
=====

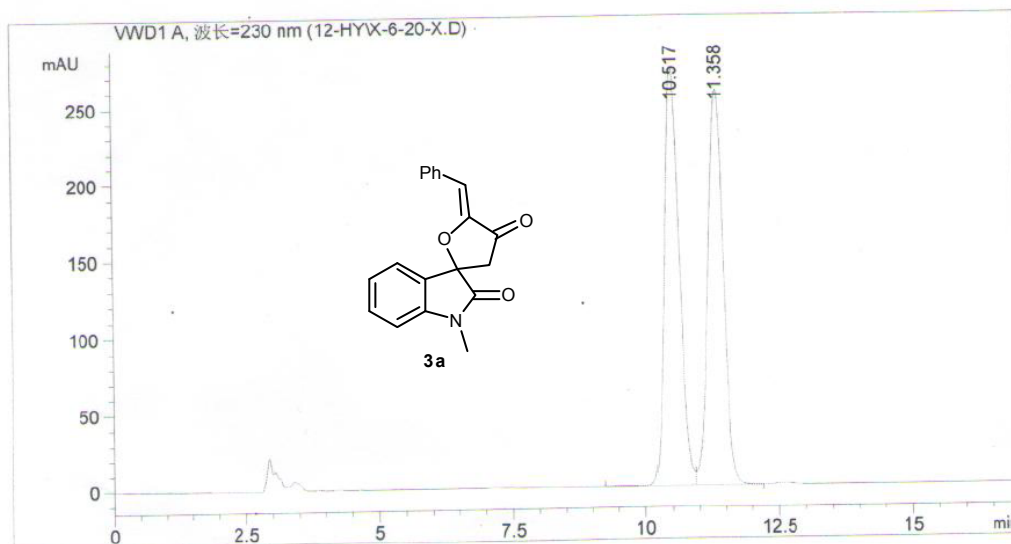

=====  
面积百分比报告  
=====

排序 : 信号  
乘积因子 : 1.0000  
稀释因子 : 1.0000  
内标使用乘积因子和稀释因子

信号 1: WVD1 A, 波长=230 nm

| 峰 # | 保留时间 [min] | 类型 | 峰宽 [min] | 峰面积 mAU *s | 峰高 [mAU]  | 峰面积 %   |
|-----|------------|----|----------|------------|-----------|---------|
| 1   | 10.517     | BV | 0.2880   | 5142.66064 | 275.13461 | 49.7921 |
| 2   | 11.358     | VV | 0.3117   | 5185.61523 | 259.61255 | 50.2079 |

总量 : 1.03283e4 534.74716

=====  
\*\*\* 报告结束 \*\*\*  
=====

数据文件: D:\CHEM32\2\DATA\12-HY\X-6-20-3AY.D

```

=====
操作者      :
仪器        : 仪器 2                      位置 : 样品瓶 1
进样日期    : 2012-6-20 9:24:46 上午
采集方法    : D:\CHEM32\2\DATA\10-YING\M100604A-C.D\DA.M
最后修改    : 2012-6-20 9:18:38 上午
              (调用后修改)
分析方法    : D:\CHEM32\2\DATA\10-YING\M100604A-C.D\DA.M
最后修改    : 2012-6-19 11:41:47 上午
样品信息    : AD-H Hexane:Isopropanol=70:30 1.0mL/min 53bar
    
```

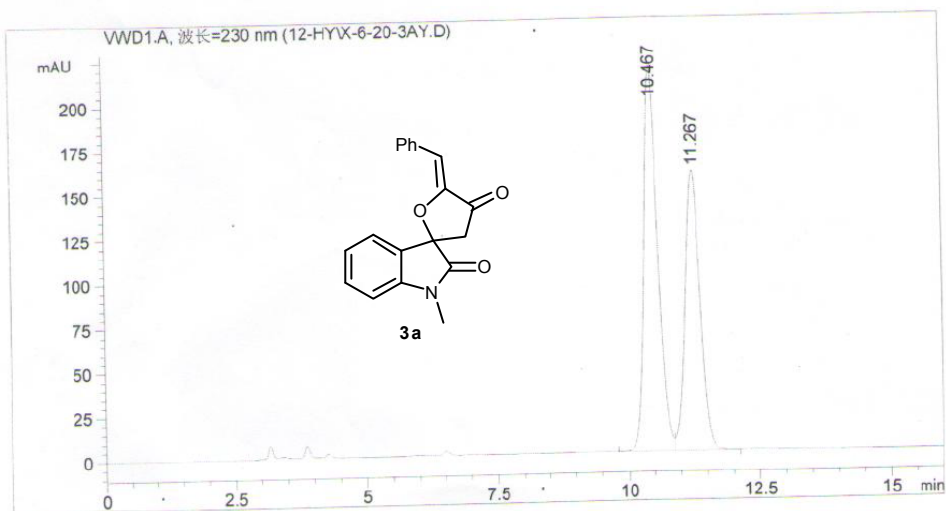

面积百分比报告

```

=====
排序      :      信号
乘积因子  :      1.0000
稀释因子  :      1.0000
内标使用乘积因子和稀释因子
    
```

信号 1: WVD1 A, 波长=230 nm

| 峰 # | 保留时间 [min] | 类型 | 峰宽 [min] | 峰面积 mAU *s | 峰高 [mAU]  | 峰面积 %   |
|-----|------------|----|----------|------------|-----------|---------|
| 1   | 10.467     | VV | 0.2835   | 4048.84375 | 218.19069 | 56.2953 |
| 2   | 11.267     | VB | 0.3067   | 3143.30444 | 158.74644 | 43.7047 |

总量 : 7192.14819 376.93713

\*\*\* 报告结束 \*\*\*
